# Supplementary material for: Offline two-dimensional liquid chromatography coupled with ion mobility-quadrupole time-of-flight mass spectrometry enabling four-dimensional separation and characterization of the multicomponents from white ginseng and red ginseng
Source: PubMed Central journal article supplement — J Pharm Anal. 2019 Nov 3;10(6):597–609. doi: 10.1016/j.jpha.2019.11.001 (PMC7775852; doi:10.1016/j.jpha.2019.11.001), 2019-11-03
Supplement: mmc1.pdf [file mmc1.pdf]

<Journal of Pharmaceutical Analysis>

Electronic Supplementary Material

**Offline two-dimensional liquid chromatography coupled with ion mobility-quadrupole time-of-flight mass spectrometry enabling four-dimensional separation and characterization of the multicomponents from white ginseng and red ginseng**

## Contents

*Asterisk equations for evaluation of orthogonality.*

**Fig. S1** Development of the offline 2D-LC system: comparison of different mobile phase in <sup>2</sup>D chromatography. Chromatographic separation was achieved on an HSS T3 column (2.1 × 100 mm, 1.8 μm). ACN: acetonitrile; FA: formic acid; AA: ammonium acetate.

**Fig. S2** Development of the offline 2D-LC system: comparison of the temperature of the HSS T3 column in <sup>2</sup>D chromatography.

**Fig. S3** Development of the offline 2D-LC system: comparison of different mobile phase on the Acchrom XAmide column in <sup>1</sup>D chromatography.

**Fig. S4** Development of the offline 2D-LC system: comparison of the temperature of the Acchrom XAmide column in <sup>1</sup>D chromatography.

**Fig. S5** Comparison of capillary voltage (**A**: 1.5–3.5 kV) and cone voltage (**B**: 0–80 V) on the ionization of six representative ginsenosides.

**Fig. S6** Optimization of ramp collision energy of the VION IMS-QTOF mass spectrometer in the negative mode using four ginsenoside compounds.

**Fig. S7** Orthogonality evaluation of the developed offline 2D-LC system by asterisk equations.

**Fig. S8** Illustration for the superiority of offline 2D-LC/MS over one-dimensional UHPLC-MS with two cases. The <sup>1</sup>D HILIC could separate easily co-eluting compounds from the total extract into different fractions, thus better analysis of ginsenosides was achieved by <sup>2</sup>D RP-UHPLC-MS.

**Fig. S9** The ion-mobility features of a reference compound Rb1. (**A**) the mobility trace of three ions with  $m/z$  1107.5966 identified by UNIFI; (**B**) enlarged MS<sup>1</sup> spectrum showing the complex ion clusters containing the [M-H]<sup>-</sup> and [2M-2H]<sup>2-</sup> precursor ions; (**C**) the MS<sup>2</sup> spectra of peaks a-c matched by UNIFI. Peak c was putatively characterized as a fragment of the dimeric precursor [2M-H]<sup>-</sup> with  $m/z$  1107.5966.

**Fig. S10** Automated annotation of the MS<sup>2</sup> spectra of two OA-type ginsenosides (a

reference compound, ginsenoside Ro; an unknown saponin **114#**) by UNIFI™ that incorporates an in-house ginsenoside library.

**Table S1** Information of the chromatographic columns examined in <sup>1</sup>D and <sup>2</sup>D separation.

**Table S2** Parameter settings for UNIFI used for data processing and characterization of ginsenosides from white ginseng (WG) and red ginseng (RG).

**Table S3** Information of 323 compounds identified from white ginseng (WG) and red ginseng (RG).

*Asterisk equations for evaluation of orthogonality.*

$$t_{R,\text{norm}(i)} = \frac{t_I - t_D}{t_G - t_D} \quad \text{Eq. 1}$$

$$SZ_- = \sigma \{ {}^1 t_{R,\text{norm}(i)} - {}^2 t_{R,\text{norm}(i)} \} \quad \text{Eq. 2}$$

$$SZ_+ = \sigma \{ {}^2 t_{R,\text{norm}(i)} - (1 - {}^1 t_{R,\text{norm}(i)}) \} \quad \text{Eq. 3}$$

$$SZ_1 = \sigma \{ {}^1 t_{R,\text{norm}(i)} - 0.5 \} \quad \text{Eq. 4}$$

$$SZ_2 = \sigma \{ {}^2 t_{R,\text{norm}(i)} - 0.5 \} \quad \text{Eq. 5}$$

$$Z_- = |1 - 2.5|SZ_- - 0.4| \quad \text{Eq. 6}$$

$$Z_+ = |1 - 2.5|SZ_+ - 0.4| \quad \text{Eq. 7}$$

$$Z_1 = 1 - |2.5 \cdot SZ_1 \cdot \sqrt{2} - 1| \quad \text{Eq. 8}$$

$$Z_2 = 1 - |2.5 \cdot SZ_2 \cdot \sqrt{2} - 1| \quad \text{Eq. 9}$$

$$A_0 = \sqrt{Z_- \cdot Z_+ \cdot Z_1 \cdot Z_2} \quad \text{Eq. 10}$$

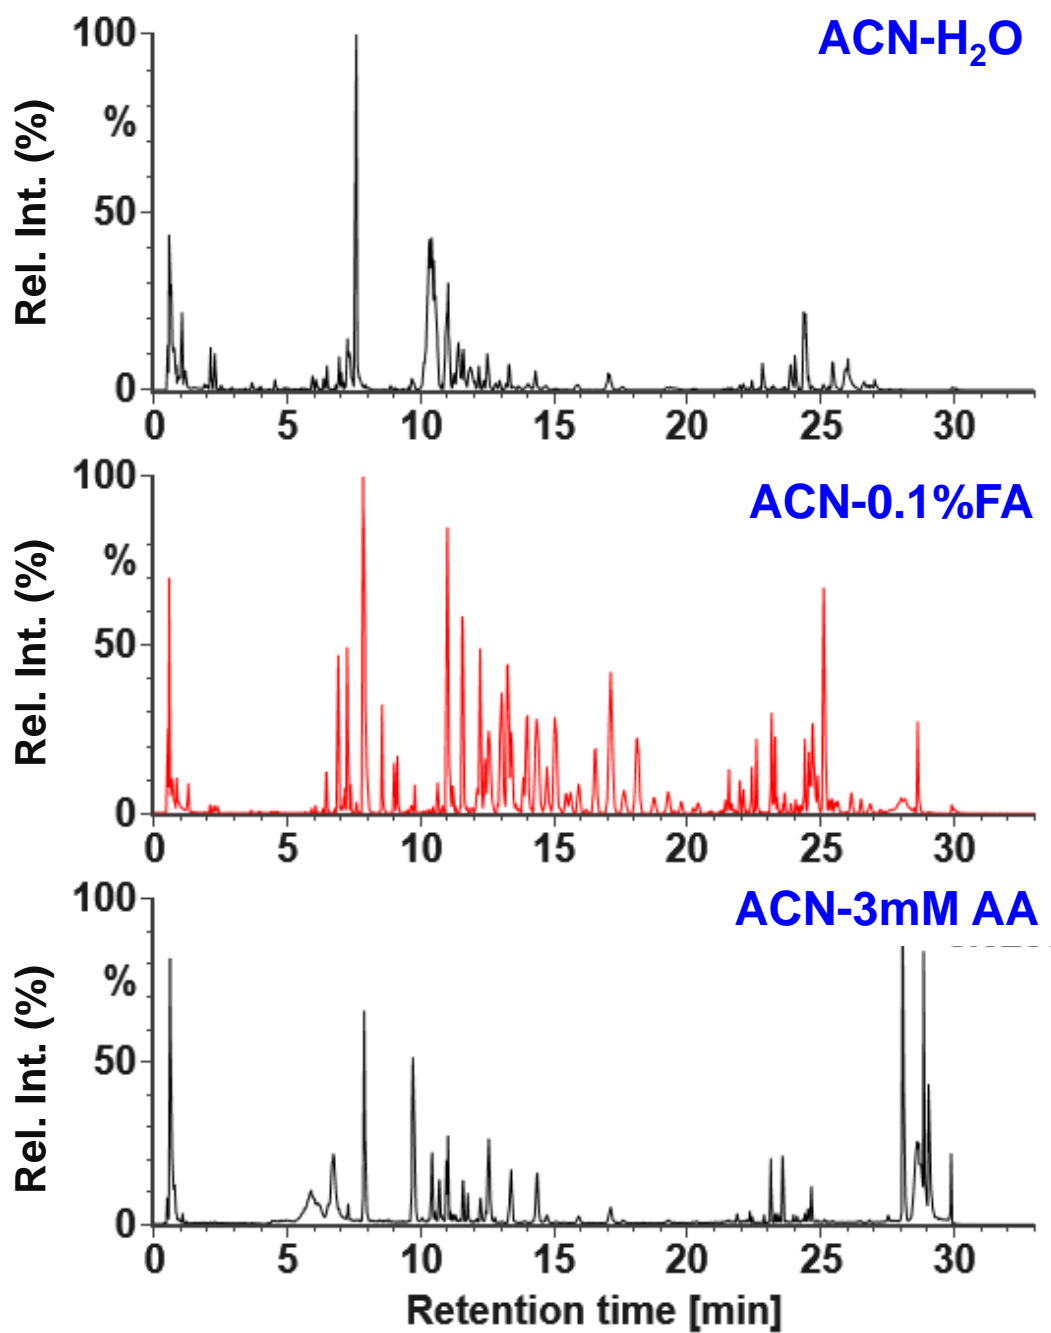

**Fig. S1** Development of the offline 2D-LC system: comparison of different mobile phase in <sup>2</sup>D chromatography. Chromatographic separation was achieved on an HSS T3 column (2.1 × 100 mm, 1.8 μm). ACN: acetonitrile; FA: formic acid; AA: ammonium acetate.

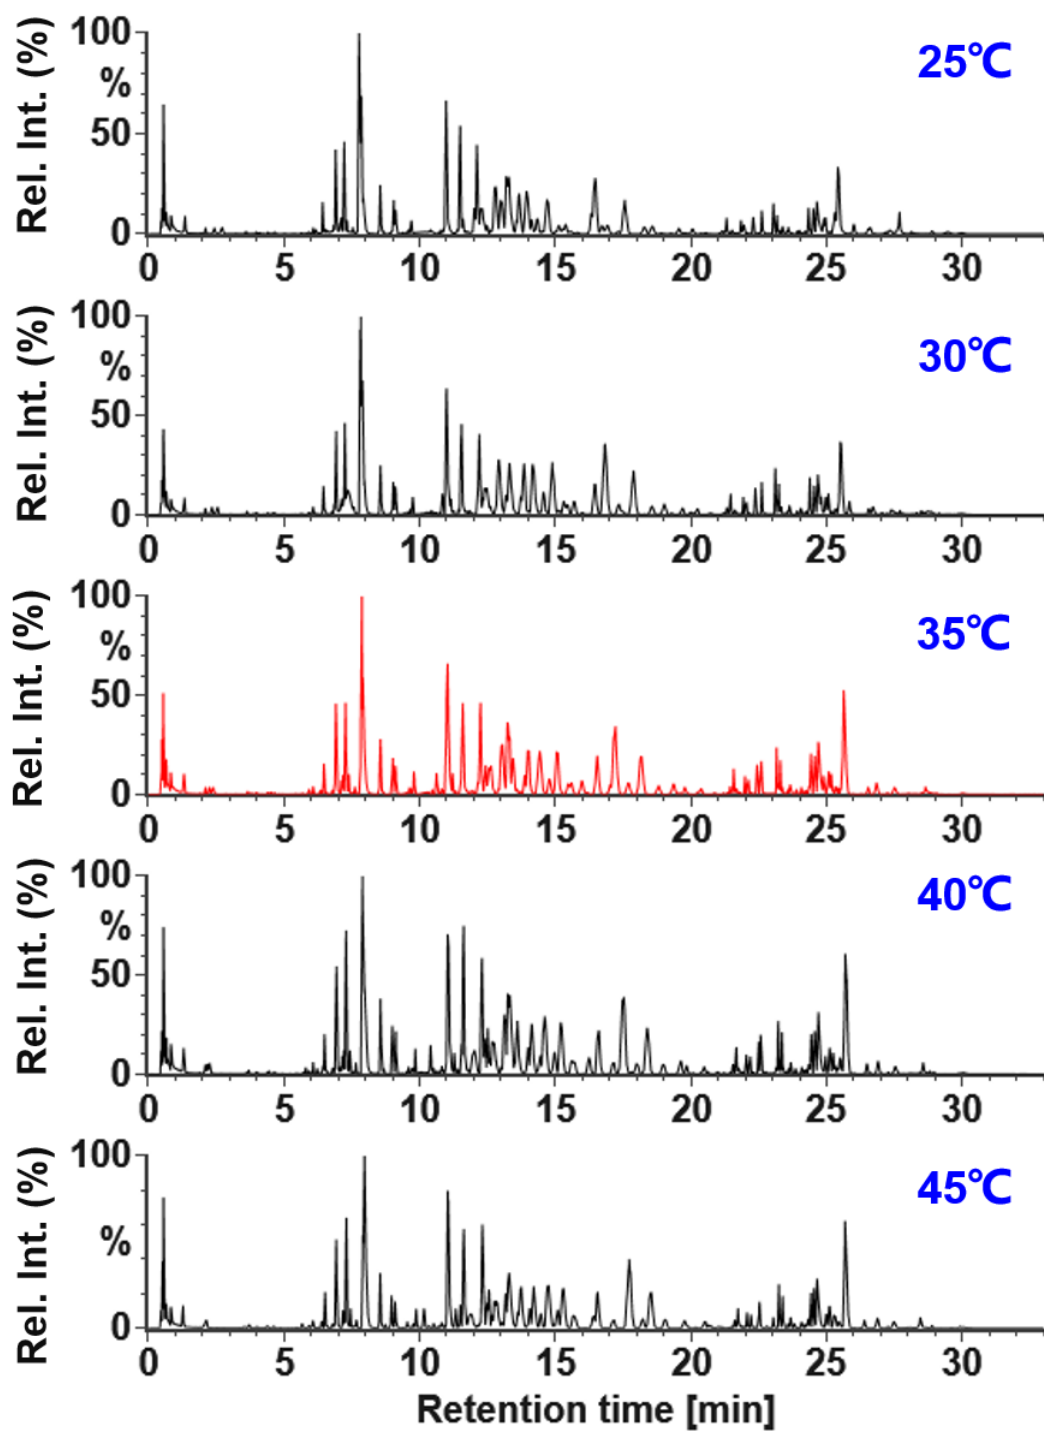

Fig. S2 Development of the offline 2D-LC system: comparison of the temperature of the HSS T3 column in <sup>2</sup>D chromatography.

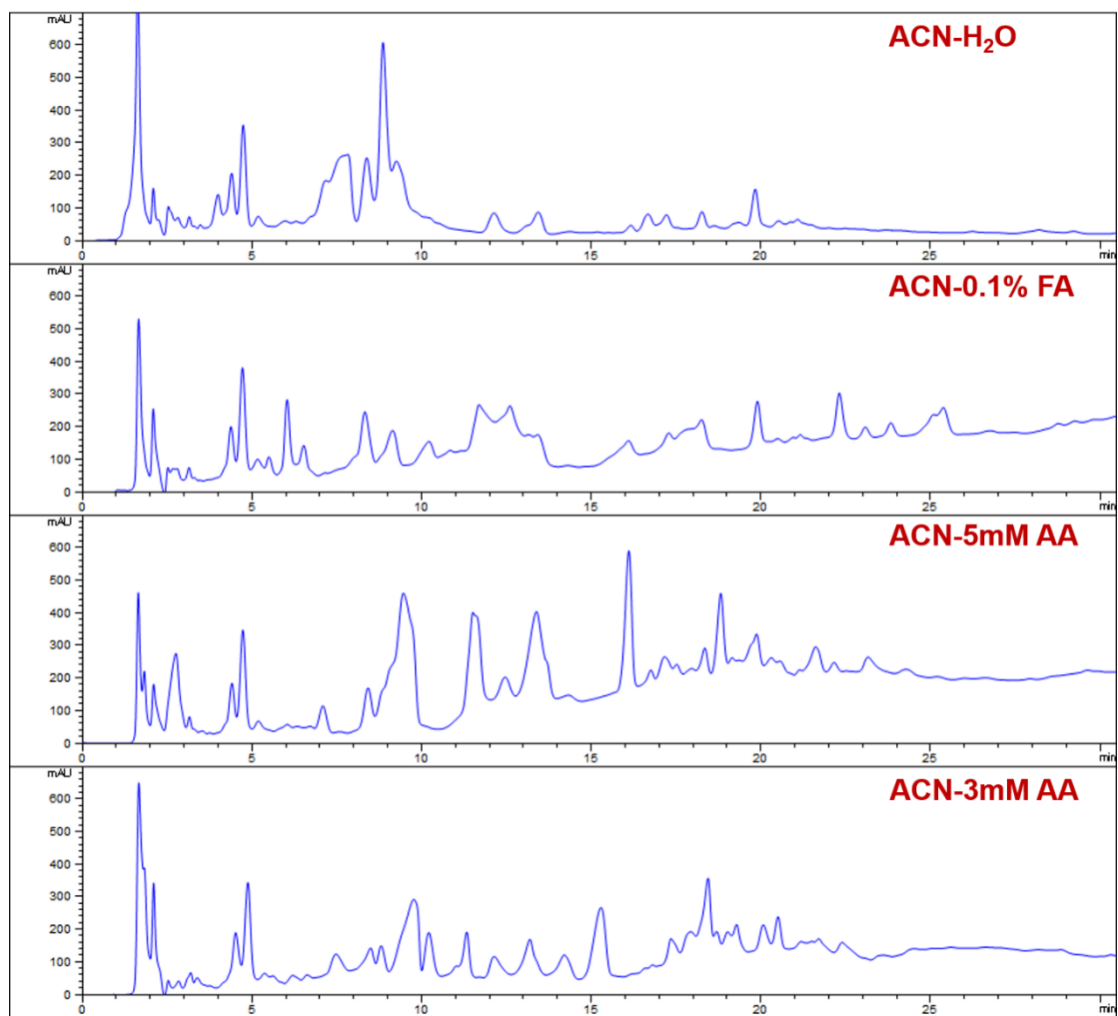

**Fig. S3** Development of the offline 2D-LC system: comparison of different mobile phase on the Acchrom XAmide column in <sup>1</sup>D chromatography.

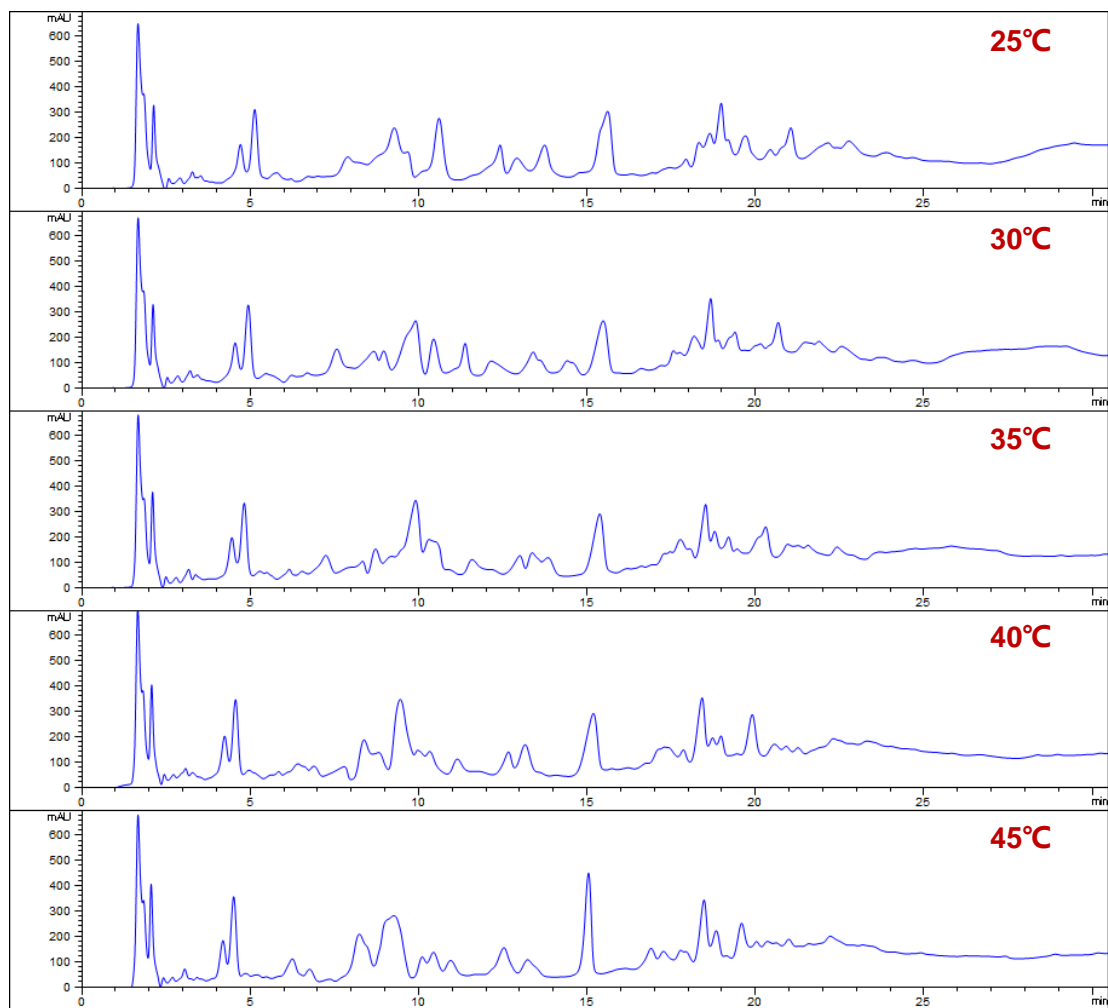

**Fig. S4** Development of the offline 2D-LC system: comparison of the temperature of the Acchrom XAmide column in <sup>1</sup>D chromatography.



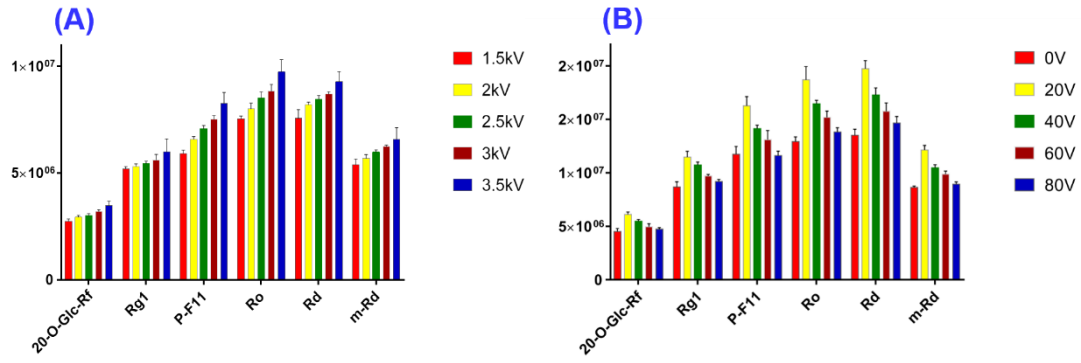

**Fig. S5** Comparison of capillary voltage (A: 1.5–3.5 kV) and cone voltage (B: 0–80 V) on the ionization of six representative ginsenosides.

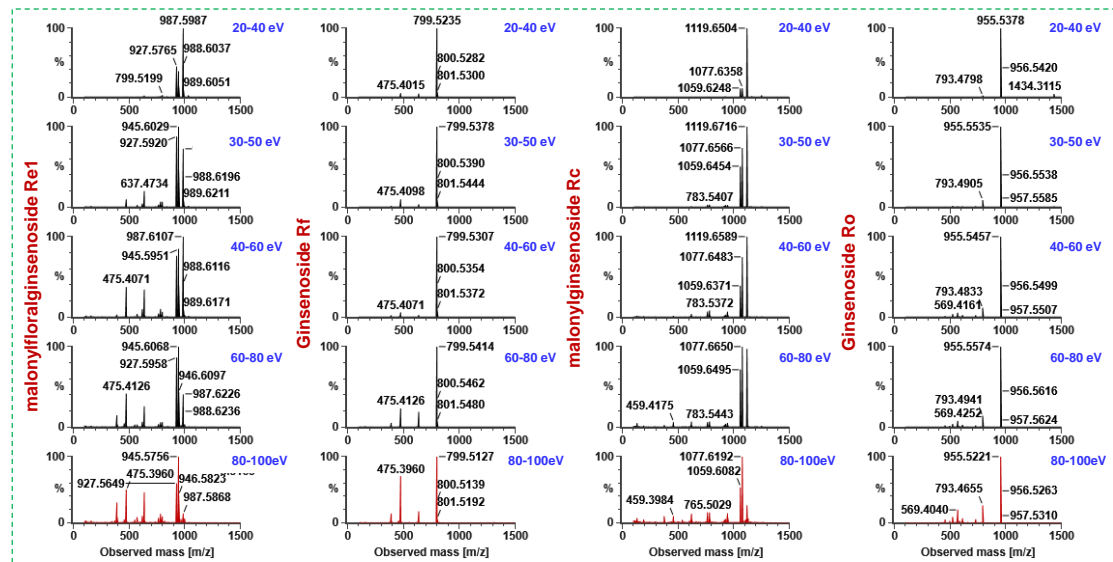

**Fig. S6** Optimization of ramp collision energy of the VION IMS-QTOF mass spectrometer in the negative mode using four ginsenoside compounds.

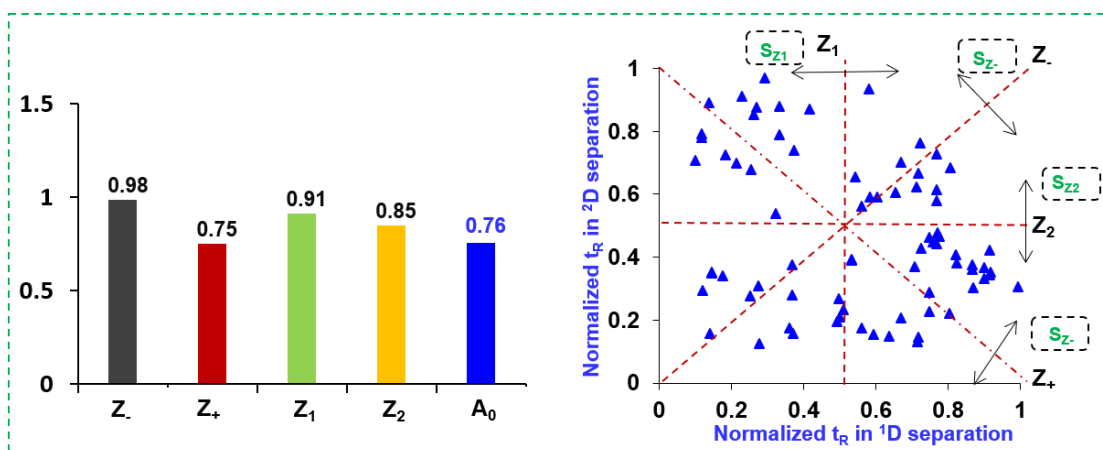

**Fig. S7** Orthogonality evaluation of the developed offline 2D-LC system by asterisk equations.

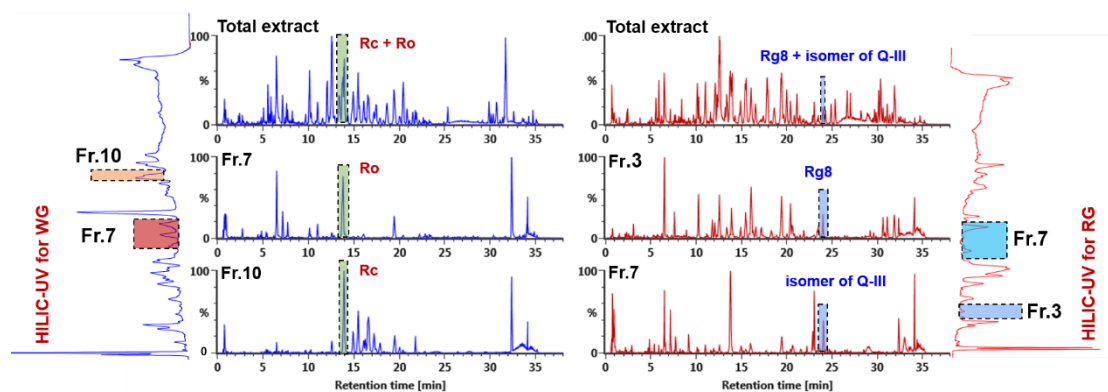

**Fig. S8** Illustration for the superiority of offline 2D-LC/MS over one-dimensional UHPLC-MS with two cases. The <sup>1</sup>D HILIC could separate easily co-eluting compounds from the total extract into different fractions, thus better analysis of ginsenosides was achieved by <sup>2</sup>D RP-UHPLC-MS.

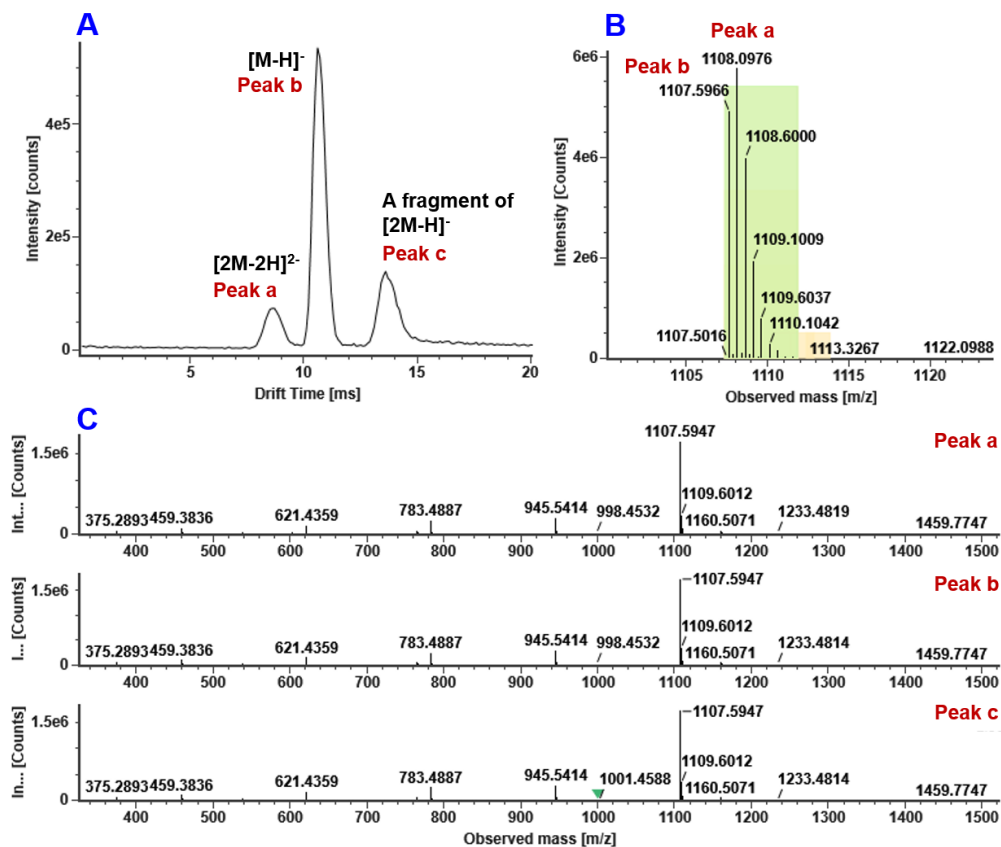

**Fig. S9** The ion-mobility features of a reference compound Rb1. (A) the mobility trace of three ions with  $m/z$  1107.5966 identified by UNIFI; (B) enlarged MS<sup>1</sup> spectrum showing the complex ion clusters containing the precursor ions  $[M-H]^-$  and  $[2M-2H]^{2-}$ ; (C) the MS<sup>2</sup> spectra of peaks a-c matched by UNIFI. Peak c was putatively characterized as a fragment of the dimeric precursor  $[2M-H]^-$  with  $m/z$  1107.5966.

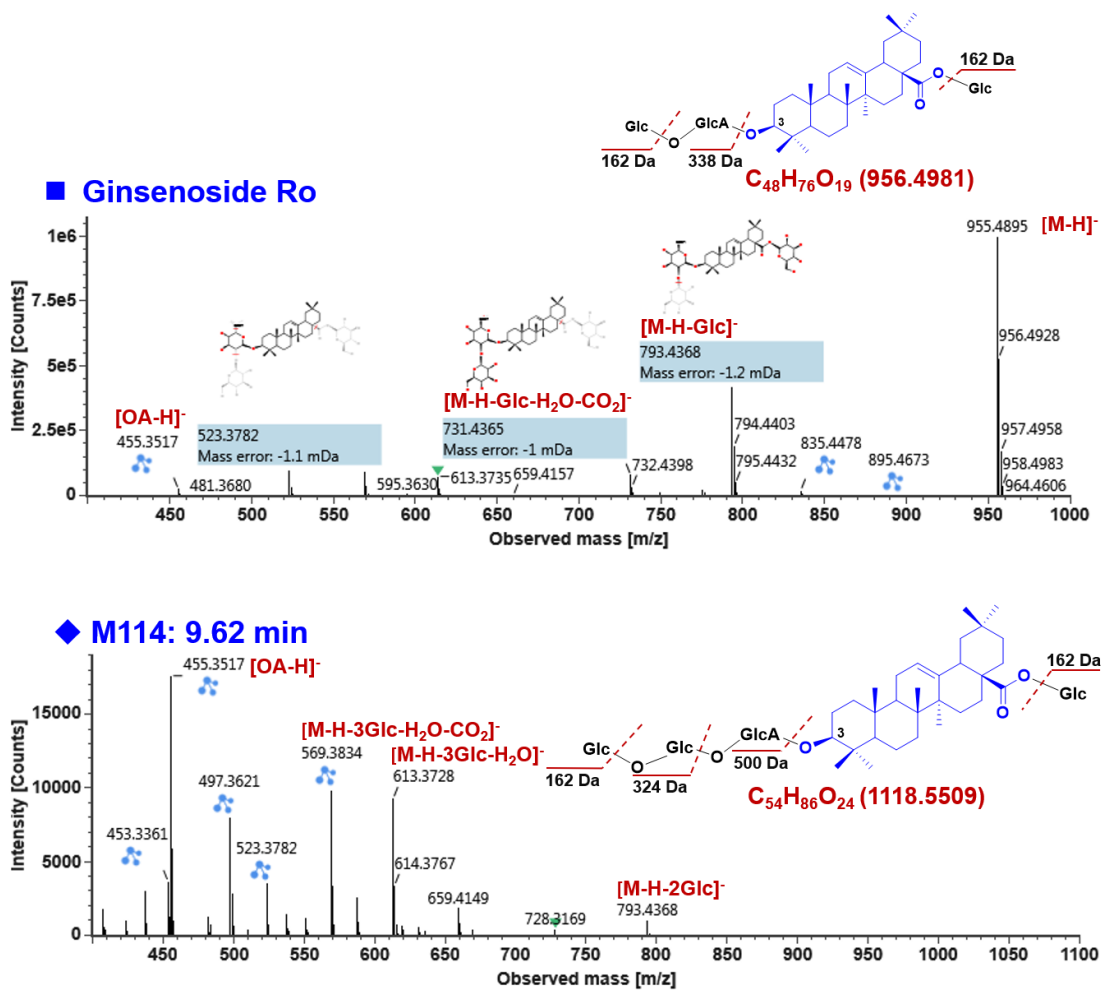

**Fig. S10** Automated annotation of the MS<sup>2</sup> spectra of two OA-type ginsenosides (a reference compound, ginsenoside Ro; an unknown saponin **114#**) by UNIFI™ that incorporates an in-house ginsenoside library.

**Table S1** Information of the chromatographic columns examined in <sup>1</sup>D and <sup>2</sup>D separation.

| No | Type                          | Specifications /<br>Manufacturer     | Separation characteristics                                                                                                                                                                                                                           | PH      | <sup>1</sup> D or <sup>2</sup> D<br>Separation |
|----|-------------------------------|--------------------------------------|------------------------------------------------------------------------------------------------------------------------------------------------------------------------------------------------------------------------------------------------------|---------|------------------------------------------------|
| 1  | HSS T3                        | 2.1×100 mm, 1.8<br>μm; Waters        | It is a silica-based C18 column with triple bond bonding to reduce carbon density and enhance polar molecular retention, also compatible with 100% aqueous phase.                                                                                    | 2–8     | <sup>2</sup> D                                 |
| 2  | BEH C18                       | 2.1×100 mm, 1.7<br>μm; Waters        | The ethylene bridge hybrid particles are bonded to C18, which is suitable for the retention of medium or weakly polar compounds; the pH tolerance range is wide.                                                                                     | 1–12    | <sup>2</sup> D                                 |
| 3  | CORTECS C18                   | 2.1×100 mm, 1.6<br>μm; Waters        | It is a solid particle column with reversed-phase column and HILIC column function, it can increase sample throughput with similar efficiency.                                                                                                       | 2–8     | <sup>2</sup> D                                 |
| 4  | CSH C18                       | 2.1×100 mm, 1.7<br>μm; Waters        | On the basis of ethylene bridge hybrid particles (BEH), a small amount of charge is controlled on the surface; it is the preferred column for alkaline drug and peptide analysis; the balance of column is faster.                                   | 1–11    | <sup>2</sup> D                                 |
| 5  | BEH Shield<br>RP18            | 2.1×100mm, 1.7<br>μm; Waters         | It has a C18 bonded phase embedded in a polar functional group, is compatible with 100% aqueous phase and has unique selectivity to phenolic acids, macrolides and other structures.                                                                 | 2–11    | <sup>2</sup> D                                 |
| 6  | ZORBAX<br>Extend C18          | 2.1×100 mm, 1.8<br>μm; Agilent       | It is a bidentate C18-C18 bond column, it has higher efficiency and better peak shape than polymer-based columns; improving retention, resolution and peak shape of basic compounds, having high sensitivity when separate the peptide and proteins. | 2–11.5  | <sup>2</sup> D                                 |
| 7  | ZORBAX<br>Eclipse plus<br>C18 | 2.1×100 mm, 1.8<br>μm; Agilent       | It is a silica-based C18 column with excellent peak shape for basic compound analysis.                                                                                                                                                               | 2–9     | <sup>2</sup> D                                 |
| 8  | Luna Omega<br>Polar C18       | 2.1×100 mm, 1.6<br>μm;<br>Phenomenex | It is a silica-based C18 column that enhances the retention of polar and non-polar compounds, its C18 ligand                                                                                                                                         | 1.5–8.5 | <sup>2</sup> D                                 |

|    |                  |                                |                                                                                                                                                                                                                                 |         |                |
|----|------------------|--------------------------------|---------------------------------------------------------------------------------------------------------------------------------------------------------------------------------------------------------------------------------|---------|----------------|
|    |                  |                                | provides a stable hydrophobic interaction in aqueous solution.                                                                                                                                                                  |         |                |
| 9  | ZORBAX SB-Aq     | 2.1×100 mm, 1.8 μm; Agilent    | It is a silica matrix C18 column embedded in a polar group octadecyl chain, suitable for difficult to separate acidic, basic and polar compounds, with a hydrophilic surface, 100% aqueous solution is stable.                  | 1–8     | <sup>2</sup> D |
| 10 | ZORBAX SB-C18    | 2.1×100 mm, 1.8 μm; Agilent    | It has an octadecyl chain with a polar group embedded in it. It is suitable for acidic, basic and polar compounds that are difficult to separate. It has a hydrophilic surface, is stable for 100% aqueous solution.            | 1–8     | <sup>2</sup> D |
| 11 | XCharge C18      | 4.6×150 mm, 5 μm; Acchrom      | It uses a surface electrostatically controlled bonding technique to introduce a positive charge on the surface of the reverse-phase bonded silica and improves the peak shape and separation selectivity of the basic compound. | 1–9     | <sup>1</sup> D |
| 12 | Kinetex Biphenyl | 2.1×100 mm, 1.7 μm; Phenomenex | It is a phenyl shell core column that is stable in 100% aqueous solution and provides excellent reverse hydrophobic retention and polar selectivity for aromatic.                                                               | 1.5–8.5 | <sup>1</sup> D |
| 13 | Xbridge Amide    | 4.6×150 mm, 3.5 μm; Waters     | It is an ethylene bridge hybrid particle triple bond amide column and used for hydrophilic interaction chromatography.                                                                                                          | 2–11    | <sup>1</sup> D |
| 14 | HSS Cyano        | 2.1×100 mm, 1.8 μm; Waters     | It is a high-strength silica gel with a sterically hindered single-bonded propyl cyanide column, also can be used for both reverse phase separation and normal phase separation.                                                | 2–8     | <sup>1</sup> D |
| 15 | XAmide           | 4.6×150 mm, 5 μm; Acchrom      | It is a neutral amido column for hydrophilic interaction chromatography, retaining highly polar analytes.                                                                                                                       | 1–9     | <sup>1</sup> D |
| 16 | CSH Phenyl-Hexyl | 2.1×100 mm, 1.7 μm; Waters     | It is a phenylhexyl column with a surface-charged hybrid matrix that has unique selectivity for aromatic compounds, especially for aromatic or amine-based aromatic compounds.                                                  | 1–11    | <sup>1</sup> D |

---

**Table S2** Parameter settings for UNIFI used for data processing and characterization of ginsenosides from white ginseng (WG) and red ginseng (RG).

| <b>Parameters</b> | <b>Detailed settings</b>                                                                                                                                                                             |
|-------------------|------------------------------------------------------------------------------------------------------------------------------------------------------------------------------------------------------|
| Find 4D Peaks     | High energy Intensity threshold: 5.0 counts<br>Low energy Intensity threshold: 1000.0 counts                                                                                                         |
| Target by Mass    | Target match tolerance: 10.0 ppm<br>√ Screen on all isotopes in a candidate<br>√ Generate predicted fragments from structure<br>Fragment match tolerance: 10.0 ppm<br>√ Look for in-source fragments |
| Adducts           | Negative adducts: +CH <sub>3</sub> COO, +Cl, +HCOO, -H, +e                                                                                                                                           |
| Lock Mass         | Combine width: 3 scans<br>Mass Window: 0.5 m/z<br>Reference Mass: 554.2620<br>Reference Charge: -1                                                                                                   |

**Table S3** Information of 323 compounds identified from white ginseng and red ginseng.

| No. | Observed m/z           | Formula                                         | Observed t <sub>R</sub> (min) | Mass error (ppm) | Observed CCS (Å <sup>2</sup> ) | Adducts      | ESI-MS <sup>2</sup>                                                              | Identification                  | From WG | From RG |
|-----|------------------------|-------------------------------------------------|-------------------------------|------------------|--------------------------------|--------------|----------------------------------------------------------------------------------|---------------------------------|---------|---------|
| 1   | 1025.5556 <sup>b</sup> | C <sub>48</sub> H <sub>84</sub> O <sub>20</sub> | 1.96                          | 1.8              | 323.45                         | +HCOO,-H     | 979.5498,665.2304,509.3837,403.3110,391.2826                                     | Vinaginsenoside R13 or isomer   | WG-11   | RG-12   |
| 2   | 965.4976               | C <sub>45</sub> H <sub>76</sub> O <sub>19</sub> | 1.97                          | 1.3              | 308.20                         | +HCOO,-H,+Cl | 919.4920,433.2955,403.3203,391.2839                                              | Floralginsenoside Kb or isomer  | WG-6    | RG-11   |
| 3   | 1039.5349              | C <sub>48</sub> H <sub>82</sub> O <sub>21</sub> | 2.58                          | 1.8              | 323.96                         | +HCOO,-H,+Cl | 781.4332,709.3437,457.3304,391.2841                                              | Floralginsenoside K or isomer   | WG-6    | RG-11   |
| 4   | 1007.5441              | C <sub>48</sub> H <sub>82</sub> O <sub>19</sub> | 2.90                          | 0.8              | 323.72                         | +HCOO,+Cl    | 961.5392,781.4709,707.3451,391.2840                                              | PPT+3Glc                        | WG-6    | RG-10   |
| 5   | 877.4816 <sup>b</sup>  | C <sub>42</sub> H <sub>72</sub> O <sub>16</sub> | 3.06                          | 1.6              | 298.99/238.71                  | +HCOO,+Cl    | 866.3772,814.3452,625.2692,609.1462,501.2375,525.2676,501.2375,453.3363,391.2841 | Compound I or isomer            | WG-6    | RG-6    |
| 6   | 859.4711 <sup>b</sup>  | C <sub>40</sub> H <sub>70</sub> O <sub>15</sub> | 3.06                          | 1.6              | 291.69                         | +HCOO,-H     | 609.1463,453.3363,391.2841                                                       | Vinaginsenoside R25 or isomer   | WG-6    | RG-6    |
| 7   | 877.4815               | C <sub>42</sub> H <sub>72</sub> O <sub>16</sub> | 3.22                          | 1.5              | 300.92/236.21                  | +HCOO,+Cl    | 831.476,643.2304,445.2030,391.2844                                               | Compound I or isomer            | WG-6    | RG-9    |
| 8   | 1023.5395              | C <sub>48</sub> H <sub>82</sub> O <sub>20</sub> | 3.36                          | 1.3              | 325.65                         | +HCOO,-H,+Cl | 977.5339,853.3663,797.4686,765.4439,457.3310,391.2845                            | Floralginsenoside I or isomer   | WG-6    | RG-6    |
| 9   | 1169.5984 <sup>b</sup> | C <sub>54</sub> H <sub>92</sub> O <sub>24</sub> | 4.04                          | 2.3              | 335.46                         | +HCOO,-Cl    | 1123.5881,637.4297,475.3775,391.2839.                                            | PPT+4Glc                        | WG-11   | RG-10   |
| 10  | 863.5020 <sup>b</sup>  | C <sub>42</sub> H <sub>74</sub> O <sub>15</sub> | 4.25                          | 1.2              | 293.45                         | +HCOO        | 509.3826,403.3211,391.2838                                                       | Quinquenoside L9 or isomer      | WG-2    | RG-6    |
| 11  | 1169.5975 <sup>b</sup> | C <sub>54</sub> H <sub>92</sub> O <sub>24</sub> | 4.44                          | 1.3              | 346.26                         | +HCOO,+Cl    | 1123.5936,943.5225,750.3642,475.3772,391.2839                                    | PPT+4Glc                        | WG-11   | RG-10   |
| 12  | 861.4862               | C <sub>42</sub> H <sub>72</sub> O <sub>15</sub> | 4.44                          | 1.0              | 288.84                         | +HCOO,-H, Cl | 815.4808,707.3410,553.3349,463.2161,391.2837                                     | Floralquinquenoside B or isomer | WG-7    | RG-6    |



|    |                        |                                                  |      |     |               |                   |                                                                     |                                |       |       |
|----|------------------------|--------------------------------------------------|------|-----|---------------|-------------------|---------------------------------------------------------------------|--------------------------------|-------|-------|
| 13 | 863.5016               | C <sub>42</sub> H <sub>74</sub> O <sub>15</sub>  | 4.49 | 0.7 | 287.05        | +HCOO,-H, Cl      | 817.4957,477.3572,417.3355,373.2740                                 | Quinquenoside L9 or isomer     | WG-7  | RG-7  |
| 14 | 861.4862               | C <sub>42</sub> H <sub>72</sub> O <sub>15</sub>  | 4.69 | 1.1 | 289.30        | +HCOO, -H.        | 815.4790,653.4255,491.3720,391.2840                                 | PPT-OH+2Glc                    | WG-7  | RG-6  |
| 15 | 1159.5691 <sup>b</sup> | C <sub>54</sub> H <sub>92</sub> O <sub>24</sub>  | 4.83 | 1.6 | 347.04        | +Cl,-H            | 1123.5914,943.5254,751.3697,751.3697,<br>637.4301,475.3775,391.2838 | PPT+4Glc                       | WG-11 |       |
| 16 | 861.4863               | C <sub>42</sub> H <sub>72</sub> O <sub>15</sub>  | 4.84 | 1.1 | 290.42        | +HCOO,-H, Cl      | 815.4788,491.3732,391.2839,373.2735.                                | PPT-OH+2Glc                    | WG-7  | RG-6  |
| 17 | 1039.5349 <sup>b</sup> | C <sub>48</sub> H <sub>82</sub> O <sub>21</sub>  | 4.86 | 1.7 | 329.07        | +HCOO,-H, Cl      | 815.4778,637.4315,475.3520,391.2842                                 | Floralginsenoside K or isomers | WG-7  | RG-11 |
| 18 | 1315.6573 <sup>b</sup> | C <sub>60</sub> H <sub>102</sub> O <sub>28</sub> | 5.08 | 2.5 | 364.22        | +HCOO, -H.        | 1269.6519,637.4308,475.3783,391.2840                                | PPT+4Glc+Rha                   | WG-11 |       |
| 19 | 1007.5446              | C <sub>48</sub> H <sub>82</sub> O <sub>19</sub>  | 5.07 | 1.4 | 323.82/258.96 | +HCOO,-H,+Cl      | 961.5386,709.3592,475.3777,391.2844                                 | Notoginsenoside-N              | WG-7  | RG-10 |
| 20 | 1123.5926 <sup>b</sup> | C <sub>54</sub> H <sub>92</sub> O <sub>24</sub>  | 5.12 | 1.8 | 333.37        | -H,+HCOO.         | 1107.5923,863.4429,691.3507,637.4310,<br>475.3777,391.2843          | Notoginsenoside A or it isomer | WG-11 |       |
| 21 | 831.4759               | C <sub>41</sub> H <sub>70</sub> O <sub>14</sub>  | 5.15 | 1.3 | 284.70        | +HCOO, -H.        | 785.4701,391.2843,389.2685,373.2751                                 | Yesanchinoside R2 or isomer.   | WG-6  | RG-6  |
| 22 | 1153.6029 <sup>b</sup> | C <sub>54</sub> H <sub>92</sub> O <sub>23</sub>  | 5.18 | 1.5 | 337.07        | +HCOO,+Cl.        | 1107.5964,638.4353,553.3349,475.3781,<br>391.2842                   | PPT+3Glc+Rha                   | WG-11 | RG-11 |
| 23 | 1169.5983 <sup>b</sup> | C <sub>54</sub> H <sub>92</sub> O <sub>24</sub>  | 5.29 | 1.9 | 338.18        | +HCOO,+Cl.        | 1123.5896,961.5350,853.4017,637.4294,<br>475.3785                   | PPT+4Glc                       | WG-11 |       |
| 24 | 877.4809 <sup>b</sup>  | C <sub>42</sub> H <sub>72</sub> O <sub>16</sub>  | 5.31 | 0.8 | 292.12        | +HCOO, -H, +C     | 831.4753,677.4957,489.3575,391.2838                                 | Floralginsenoside A or isomer  | WG-6  | RG-6  |
| 25 | 859.4705               | C <sub>42</sub> H <sub>70</sub> O <sub>15</sub>  | 5.31 | 0.9 | 295.77        | +HCOO, -H.        | 743.4126,716.4742,489.3575,453.3362                                 | Vinaginsenoside R25 or isomer  | WG-6  | RG-10 |
| 26 | 877.4815               | C <sub>42</sub> H <sub>72</sub> O <sub>16</sub>  | 5.44 | 1.3 | 291.50        | +HCOO, -H,<br>+Cl | 831.4736,715.3896,657.3483,553.3370,3<br>91.2839,373.2736           | Floralginsenoside A or isomer  | WG-6  | RG-6  |
| 27 | 977.5343               | C <sub>47</sub> H <sub>80</sub> O <sub>18</sub>  | 5.44 | 1.7 | 310.62        | +HCOO, -H         | 931.5266,637.4310,475.3785,391.2840                                 | PPT+2Glc+Xyl                   | WG-7  | RG-6  |
| 28 | 1123.5924              | C <sub>53</sub> H <sub>90</sub> O <sub>22</sub>  | 5.48 | 1.8 | 326.42        | +HCOO, -H.        | 1077.5816,945.5384,784.4897,637.4321,                               | PPT+2Glc+Rha+Xyl               | WG-10 | RG-10 |

475.3778,391.2842.

|    |                        |                                                 |      |     |               |              |                                                                          |                               |       |       |
|----|------------------------|-------------------------------------------------|------|-----|---------------|--------------|--------------------------------------------------------------------------|-------------------------------|-------|-------|
| 29 | 831.4752               | C <sub>41</sub> H <sub>70</sub> O <sub>14</sub> | 5.49 | 0.5 | 286.4770      | +HCOO,-H,+Cl | 831.4752,491.3732,455.3523,389.2676                                      | Notoginsenoside Rw2 or isomer | WG-11 | RG-13 |
| 30 | 845.4911               | C <sub>42</sub> H <sub>72</sub> O <sub>14</sub> | 5.52 | 0.8 | 285.24        | +HCOO,+Cl    | 799.4835,637.4305,475.3784,391.2834                                      | PPT+2Glc                      | WG-2  | RG-1  |
| 31 | 1007.5456 <sup>a</sup> | C <sub>48</sub> H <sub>82</sub> O <sub>19</sub> | 5.55 | 2.4 | 321.98/255.28 | +HCOO, -H.   | 961.5364,799.4841,637.4308,475.3781,391.2842                             | 20-O-glucosyl-ginsenoside Rf  | WG-9  | RG-6  |
| 32 | 1093.5815              | C <sub>53</sub> H <sub>90</sub> O <sub>23</sub> | 5.56 | 1.3 | 330.70        | -H,+HCOO.    | 961.5370,637.4300,475.3777,391.2838                                      | PPT+3Glc+Xy                   | WG-11 | RG-11 |
| 33 | 977.5345               | C <sub>47</sub> H <sub>80</sub> O <sub>18</sub> | 5.69 | 1.9 | 372.74/253.18 | +HCOO,-H,+Cl | 931.5252,799.4849,637.4322,475.3785,373.2741                             | PPT+2Glc+Xyl                  | WG-9  | RG-6  |
| 34 | 1007.5458 <sup>a</sup> | C <sub>48</sub> H <sub>82</sub> O <sub>19</sub> | 5.74 | 2.5 | 320.78        | +HCOO, -H.   | 961.5376,637.4322,475.3786,391.2847                                      | Ginsenoside Re3               | WG-9  | RG-9  |
| 35 | 1153.6032              | C <sub>54</sub> H <sub>92</sub> O <sub>23</sub> | 5.74 | 1.8 | 341.73        | +HCOO,-H, Cl | 1107.5963,961.5388,945.5384,799.4869,783.4891,637.4306,475.3781,391.2838 | PPT+3Glc+Rha                  | WG-11 | RG-11 |
| 36 | 1007.5452              | C <sub>48</sub> H <sub>82</sub> O <sub>19</sub> | 5.77 | 1.9 | 313.99        | +HCOO,-H, Cl | 961.5376,783.4852,619.4176.                                              | PPT+3Glc                      | WG-11 | RG-11 |
| 37 | 903.4962 <sup>b</sup>  | C <sub>44</sub> H <sub>74</sub> O <sub>16</sub> | 5.80 | 0.3 | 300.25        | +HCOO, -H.   | 815.4784,707.3449,545.2929,491.3733,371.2576                             | PPT-OH+2Glc+Ac                | WG-8  | RG-8  |
| 38 | 699.4330               | C <sub>36</sub> H <sub>62</sub> O <sub>10</sub> | 5.82 | 0.8 | 260.61        | +HCOO, -Cl   | 554.3413,493.3882                                                        | Notoginsenoside R8 or isomer  | WG-11 | RG-11 |
| 39 | 1187.6086              | C <sub>54</sub> H <sub>94</sub> O <sub>25</sub> | 5.86 | 1.7 | 358.12        | +HCOO, -H.   | 1141.6027,493.3879,391.2843                                              | Quinquenoside L16 or isomer   | WG-11 | RG-11 |
| 40 | 977.534 <sup>a</sup>   | C <sub>47</sub> H <sub>80</sub> O <sub>18</sub> | 5.90 | 1.4 | 319.37        | +HCOO,-H,+Cl | 931.5251,799.4835,637.4302,475.3776,391.2838                             | Notoginsenoside R1            | WG-8  | RG-6  |
| 41 | 859.4709 <sup>b</sup>  | C <sub>42</sub> H <sub>70</sub> O <sub>15</sub> | 5.95 | 1.5 | 295.03        | +HCOO, -H.   | 543.2778,491.3719,391.2838.                                              | Vinaginsenoside R25 or isomer | WG-6  | RG-6  |
| 42 | 1007.5460 <sup>a</sup> | C <sub>48</sub> H <sub>82</sub> O <sub>19</sub> | 5.97 | 2.8 | 312.78        | +HCOO, -H    | 961.5371,799.4842,637.4312,475.3781,391.2841                             | Ginsenoside Re2               | WG-9  | RG-6  |

|    |                        |                                                 |      |      |               |                |                                                         |                                 |       |       |
|----|------------------------|-------------------------------------------------|------|------|---------------|----------------|---------------------------------------------------------|---------------------------------|-------|-------|
| 43 | 1157.5974              | C <sub>53</sub> H <sub>92</sub> O <sub>24</sub> | 5.99 | 1.2  | 349.94        | +HCOO, -H      | 493.3880,399.3233,375.2893                              | Chikusetsusaponin FM1 or isomer | WG-11 | RG-10 |
| 44 | 977.5335               | C <sub>47</sub> H <sub>80</sub> O <sub>18</sub> | 6.16 | 0.9  | 382.47        | +HCOO          | 931.5276,475.3787,391.2843                              | PPT+2Glc+Xyl                    | WG-7  | RG-7  |
| 45 | 1153.6034 <sup>b</sup> | C <sub>54</sub> H <sub>92</sub> O <sub>23</sub> | 6.17 | 2.0  | 340.26        | +HCOO,-H,+Cl   | 1107.5974,945.5411,783.4865,637.4305,475.3777,391.2841  | PPT+3Glc+Rha                    | WG-11 |       |
| 46 | 1167.5820              | C <sub>54</sub> H <sub>90</sub> O <sub>24</sub> | 6.18 | 1.3  | 340.96        | +HCOO,-H,+Cl   | 1121.5722,1012.4310,851.3842,689.3336,473.3633,389.2678 | Quinquenoside IV or isomer      | WG-11 | RG-10 |
| 47 | 847.4307               | C <sub>41</sub> H <sub>70</sub> O <sub>15</sub> | 6.18 | 0.8  | 286.09        | +HCOO,-H,+Cl   | 801.4596,685.3806,553.3355,391.2836                     | Floralginsenoside C or isomer   | WG-5  | RG-13 |
| 48 | 1007.5455              | C <sub>48</sub> H <sub>82</sub> O <sub>19</sub> | 6.19 | 2.2  | 314.70        | +HCOO, -H      | 961.5365,799.4826,637.4311,475.3783.391.2842            | PPT+3Glc                        | WG-9  | RG-9  |
| 49 | 861.4871               | C <sub>42</sub> H <sub>72</sub> O <sub>15</sub> | 6.20 | 2.0  | 300.99        | +HCOO, -H, +Cl | 815.4794,693.3335,553.3355,459.3481,392.2870            | Floralquinquenoside B or isomer | WG-7  | RG-7  |
| 50 | 1049.5556              | C <sub>50</sub> H <sub>84</sub> O <sub>20</sub> | 6.22 | -0.8 | 327.24        | +HCOO, -H      | 637.4298,475.3782,391.2840                              | PPT+3Glc+Ac                     | WG-10 | RG-7  |
| 51 | 1157.5984 <sup>b</sup> | C <sub>53</sub> H <sub>92</sub> O <sub>24</sub> | 6.27 | 2.3  | 357.85        | +HCOO          | 972.4045,861.4292,799.4941,655.4405,493.3884,375.2895   | Chikusetsusaponin FM1 or isomer | WG-11 | RG-13 |
| 52 | 1169.5975 <sup>b</sup> | C <sub>54</sub> H <sub>92</sub> O <sub>24</sub> | 6.27 | 1.3  | 350.90        | +HCOO, -H      | 1123.5880,637.4302,475.3775                             | PPT+4Glc                        | WG-11 | RG-13 |
| 53 | 1187.6084 <sup>b</sup> | C <sub>54</sub> H <sub>94</sub> O <sub>25</sub> | 6.40 | 1.8  | 357.36        | +HCOO,-H, +Cl  | 1141.6033,799.9658,655.4418,493.3891,375.22902          | Quinquenoside L16 or isomer     | WG-11 | RG-12 |
| 54 | 991.5492 <sup>a</sup>  | C <sub>48</sub> H <sub>82</sub> O <sub>18</sub> | 6.49 | 0.9  | 323.77/253.95 | +HCOO,-H, +Cl  | 945.5408,637.4310,475.3781,391.2838                     | Ginsenoside Re                  | WG-11 | RG-7  |
| 55 | 845.4936 <sup>a</sup>  | C <sub>42</sub> H <sub>72</sub> O <sub>14</sub> | 6.50 | 1.4  | 294.55/239.05 | +HCOO, +Cl     | 799.4833,637.4305,475.3778,391.2839                     | Ginsenoside Rg1                 | WG-6  | RG-6  |
| 56 | 1025.5551 <sup>b</sup> | C <sub>48</sub> H <sub>84</sub> O <sub>20</sub> | 6.57 | 1.3  | 329.87        | +HCOO, -H, +Cl | 979.5497,593.2775,493.3870,375.2893                     | Vinaginsenoside R13 or isomer   | WG-10 | RG-9  |

|    |                        |                                                 |      |      |        |                            |                                                                                  |                                                   |       |       |
|----|------------------------|-------------------------------------------------|------|------|--------|----------------------------|----------------------------------------------------------------------------------|---------------------------------------------------|-------|-------|
| 57 | 1157.5974 <sup>b</sup> | C <sub>53</sub> H <sub>92</sub> O <sub>24</sub> | 6.63 | 1.1  | 352.55 | +HCOO, -H                  | 1111.5917,656.4467,493.3890                                                      | Chikusetsusaponin FM1 or isomer                   | WG-11 | RG-13 |
| 58 | 1049.5534 <sup>b</sup> | C <sub>50</sub> H <sub>84</sub> O <sub>20</sub> | 6.77 | -0.4 | 327.95 | +HCOO, -H                  | 1003.5498,962.5401,637.4326,475.3782,391.2840                                    | PPT+3Glc+Ac                                       | WG-10 | RG-11 |
| 59 | 1049.5535 <sup>b</sup> | C <sub>50</sub> H <sub>84</sub> O <sub>20</sub> | 6.97 | -0.3 | 327.24 | +HCOO, -H                  | 961.5359,493.3891,475.3782,391.2840                                              | PPT+3Glc+Ac                                       | WG-10 | RG-9  |
| 60 | 1211.6019 <sup>b</sup> | C <sub>58</sub> H <sub>96</sub> O <sub>24</sub> | 6.80 | 2.8  | 352.49 | -Cl                        | 972.4032,853.3991,799.4823,655.4418,493.3888,475.3779,375.2893                   | PPT+3Glc+Rha+Butenoyl (Ginsenoside Ra6 or isomer) | WG-11 |       |
| 61 | 695.4385               | C <sub>36</sub> H <sub>60</sub> O <sub>9</sub>  | 6.93 | 1.3  | 262.06 | +CH <sub>3</sub> COO,+HCOO | 635.4232,491.3749,389.2694                                                       | Notoginsenoside ST14 or isomer                    | WG-6  |       |
| 62 | 1019.5427 <sup>b</sup> | C <sub>49</sub> H <sub>82</sub> O <sub>19</sub> | 7.03 | -0.6 | 324.88 | +HCOO, -H                  | 973.5373,931.5230,621.4023,577.2662,553.3385,475.3790,457.3672,437.3416,391.2838 | PPT+2Glc+Xyl+Ac                                   |       | RG-10 |
| 63 | 1025.5556              | C <sub>48</sub> H <sub>48</sub> O <sub>20</sub> | 7.11 | 1.8  | 331.68 | +HCOO, -H, +Cl             | 979.5481,799.4853,655.4390,593.2793,493.3890,375.2892.                           | Vinaginsenoside R13 or isomer                     | WG-10 | RG-10 |
| 64 | 903.4983 <sup>b</sup>  | C <sub>44</sub> H <sub>74</sub> O <sub>16</sub> | 7.12 | 2.6  | 316.40 | +HCOO, -H                  | 857.4929,781.4733,637.4308,619.4203,475.3780,391.2843                            | PPT-OH+2Glc+Ac                                    | WG-7  |       |
| 65 | 665.4287               | C <sub>37</sub> H <sub>62</sub> O <sub>10</sub> | 7.15 | 2.6  | 265.57 | +HCOO,+CH <sub>3</sub> COO | 637.4308,619.4203,475.3780,391.2843                                              | PPT+Glc+COH                                       | WG-7  | Rg-7  |
| 66 | 683.4382               | C <sub>36</sub> H <sub>62</sub> O <sub>6</sub>  | 7.15 | 1.0  | 272.65 | +HCOO, -H                  | 637.4309,475.3776,391.2838.                                                      | PPT+Glc                                           | WG-7  | RG-7  |
| 67 | 887.5015 <sup>a</sup>  | C <sub>44</sub> H <sub>74</sub> O <sub>15</sub> | 7.16 | 0.6  | 306.14 | +HCOO, -H.                 | 821.4662,637.4312,475.3789,391.2841                                              | Notoginsenoside Rt                                | WG-6  | RG-7  |
| 68 | 845.4940               | C <sub>42</sub> H <sub>72</sub> O <sub>14</sub> | 7.16 | 4.3  | 294.01 | +HCOO, -H.                 | 637.4308,619.4203,475.3780,391.2843                                              | PPT+2Glc                                          | WG-7  |       |
| 69 | 1049.5544 <sup>b</sup> | C <sub>50</sub> H <sub>84</sub> O <sub>20</sub> | 7.16 | 0.7  | 318.25 | +HCOO, -H                  | 799.4851,553.3334,493.3891,475.3787,391.28404                                    | PPT+3Glc+Ac                                       | WG-10 |       |

|    |                        |                                                 |      |      |               |              |                                                                     |                                                         |       |       |
|----|------------------------|-------------------------------------------------|------|------|---------------|--------------|---------------------------------------------------------------------|---------------------------------------------------------|-------|-------|
| 70 | 1033.5580              | C <sub>50</sub> H <sub>84</sub> O <sub>19</sub> | 7.23 | -0.9 | 329.70        | +HCOO, -H.   | 945.5421,637.4310,553.3372,475.3782,3<br>91.2840                    | PPT+Rha+2Glc+Ac                                         | WG-9  | RG-9  |
| 71 | 1031.5456              | C <sub>51</sub> H <sub>84</sub> O <sub>21</sub> | 7.23 | 2.3  | 315.90        | -H           | 919.4927,945.5444,619.4202,475.3780,3<br>91.2845                    | PPT+2Glc+Rha+Mal                                        |       | RG-9  |
| 72 | 845.494                | C <sub>42</sub> H <sub>72</sub> O <sub>14</sub> | 7.29 | 1.1  | 297.56        | +HCOO, -H    | 799.4860,653.4245,392.2875,371.2583                                 | Ginsenoside Rh20 or isomer                              |       | RG-3  |
| 73 | 965.4982 <sup>b</sup>  | C <sub>45</sub> H <sub>76</sub> O <sub>19</sub> | 7.27 | 2.0  | 246.79        | +HCOO,-H,+Cl | 757.4383,537.3420,387.3256,375.2898                                 | Floralginsenoside Kb or isomer                          |       | RG-11 |
| 74 | 1065.5503              | C <sub>50</sub> H <sub>84</sub> O <sub>21</sub> | 7.52 | 1.5  | 339.00        | +HCOO        | 1021.5603,973.4038,853.4015,709.3602,<br>661.4497,493.3889,375.2890 | Floralginsenoside H or<br>Floralginsenoside G or isomer | WG-10 | RG-11 |
| 75 | 887.5017 <sup>b</sup>  | C <sub>44</sub> H <sub>74</sub> O <sub>15</sub> | 7.56 | 0.8  | 304.92        | +HCOO, -H.   | 841.4970,783.4976,554.3405,457.3681,3<br>91.2844                    | PPT+2Glc+Ac                                             | WG-7  | RG-7  |
| 76 | 1139.5871              | C <sub>53</sub> H <sub>90</sub> O <sub>23</sub> | 7.57 | 1.4  | 343.11        | +HCOO,-H,+Cl | 1093.5776,945.4382799.4838,637.4297,<br>621.4004,553.3362,475.3781  | PPT+3Glc+Xyl                                            | WG-11 | RG-10 |
| 77 | 991.5516               | C <sub>48</sub> H <sub>82</sub> O <sub>18</sub> | 7.59 | 3.3  | 323.06        | +HCOO, -H.   | 945.5416,927.5310,783.4888,637.4310,6<br>19.4203,475.3781,391.2840  | PPT+2Glc+Rha                                            | WG-9  |       |
| 78 | 1031.5451 <sup>a</sup> | C <sub>51</sub> H <sub>84</sub> O <sub>21</sub> | 7.59 | 1.8  | 319.52/243.27 | -H           | 945.5417,927.5310,799.4845,783.4881,6<br>37.4310,475.3781,391.2840  | Malonylfloralginsenoside Re1                            | WG-9  | RG-7  |
| 79 | 1033.5591              | C <sub>50</sub> H <sub>84</sub> O <sub>19</sub> | 7.59 | 0.2  | 334.30/243.61 | +HCOO, -H.   | 945.5416,799.4840,553.3381,457.3678                                 | PPT+Rha+2Glc+Ac                                         | WG-9  | RG-7  |
| 80 | 961.6388 <sup>b</sup>  | C <sub>47</sub> H <sub>80</sub> O <sub>17</sub> | 7.68 | 1.1  | 318.29        | +HCOO,-H,+Cl | 781.4727,637.4307,475.3778,392.2877                                 | PPT+Glc+Xyl+Rha                                         | WG-7  | RG-7  |
| 81 | 683.4385               | C <sub>36</sub> H <sub>62</sub> O <sub>6</sub>  | 7.72 | 1.4  | 273.23        | +HCOO, -H    | 619.4204,475.3778,355.2227                                          | PPT+Glc                                                 | WG-7  | RG-7  |
| 82 | 887.5015               | C <sub>44</sub> H <sub>74</sub> O <sub>15</sub> | 7.72 | 0.6  | 307.60        | +HCOO,-H,+Cl | 841.4938,781.4734,637.4307,619.4203,4<br>75.3779,391.2841           | PPT+2Glc+Ac                                             | WG-7  | RG-7  |
| 83 | 1139.5870              | C <sub>53</sub> H <sub>90</sub> O <sub>23</sub> | 7.73 | 1.3  | 353.36        | +HCOO,-H,+Cl | 1093.5779,984.4368,852.3973,782.4773,<br>691.3496,609.2726,445.1120 | Yesaninoside H or isomer                                | WG-11 | RG-7  |

|    |                        |                                                 |      |     |               |                                    |                                                        |                                |              |          |
|----|------------------------|-------------------------------------------------|------|-----|---------------|------------------------------------|--------------------------------------------------------|--------------------------------|--------------|----------|
| 84 | 1033.5595 <sup>b</sup> | C <sub>50</sub> H <sub>84</sub> O <sub>19</sub> | 7.73 | 0.6 | 332.10        | +HCOO, -H.                         | 781.4733,637.4307,619.4202,475.3780                    | PPT+Rha+2Glc+Ac                | WG-7         | RG-8     |
| 85 | 1005.5291              | C <sub>48</sub> H <sub>80</sub> O <sub>19</sub> | 7.78 | 1.5 | 328.56        | +HCOO,-H,+Cl                       | 959.5243,629.3035,473.3634,439.3205,389.2684           | 7-OH-5-ene-PPD-Glc-Glc-Glc     | WG-9         | RG-7     |
| 86 | 1139.5876              | C <sub>52</sub> H <sub>88</sub> O <sub>21</sub> | 7.98 | 1.8 | 359.57        | +HCOO,-H                           | 1014.4503,781.4721,691.3494,609.2728,475.3774,391.2839 | Yesanchinoside H or isomes.    | WG-11        | RG-7     |
| 87 | 1169.5981 <sup>b</sup> | C <sub>54</sub> H <sub>92</sub> O <sub>24</sub> | 8.00 | 1.8 | 356.01        | +HCOO,+Cl,+C<br>H <sub>3</sub> COO | 1123.5892,961.5369,799.4815,477.3922,375.2879          | PPT+4Glc                       | WG-tota<br>1 | RG-total |
| 88 | 1139.5868              | C <sub>54</sub> H <sub>92</sub> O <sub>25</sub> | 8.07 | 1.1 | 359.44        | -H,+HCOO                           | 984.4349,765.4431,673.3398,609.2711,537.3416,387.3247. | Notoginsenoside C or isomer    | WG-9         | RG-6     |
| 89 | 847.4752               | C <sub>42</sub> H <sub>70</sub> O <sub>14</sub> | 8.07 | 0.4 | 316.12        | +HCOO,-H                           | 765.4421,755.4217,537.3423,391.2829                    | Ginsenoside SL3 or isomer      |              | RG-13    |
| 90 | 1139.5876 <sup>b</sup> | C <sub>53</sub> H <sub>90</sub> O <sub>23</sub> | 8.13 | 1.8 | 348.40        | +HCOO,-H,+Cl                       | 1093.5813,985.4441,609.2735,537.3408,475.3778,375.2897 | PPT+3Glc+Xyl                   | WG-10        | RG-10    |
| 91 | 1167.5834              | C <sub>54</sub> H <sub>90</sub> O <sub>24</sub> | 8.20 | 2.6 | 350.04        | +HCOO,-H,+Cl                       | 1121.5731,797.4678,635.4145,455.3508,375.2890          | Notoginsenoside B or isomer    | WG-11        | RG-6     |
| 92 | 961.5384 <sup>b</sup>  | C <sub>47</sub> H <sub>80</sub> O <sub>17</sub> | 8.22 | 0.7 | 319.33        | +HCOO,-H,+Cl                       | 915.5282,621.4007,459.3470,391.2836                    | PPT+Glc+Rha+Xyl                | WG-7         | RG-7     |
| 93 | 1049.5554 <sup>b</sup> | C <sub>50</sub> H <sub>84</sub> O <sub>20</sub> | 8.27 | 1.5 | 328.55        | +HCOO,-H                           | 1003.5479,853.3987,553.3369,475.3778,459.3476          | PPT+3Glc+Ac                    |              | RG-9     |
| 94 | 1155.5923              | C <sub>53</sub> H <sub>90</sub> O <sub>24</sub> | 8.32 | 1.9 | 347.68        | +HCOO,-H,+Cl                       | 765.4446,603.3871,441.3352                             | Floralginsenoside Td or isomer | WG-6         | RG-8     |
| 95 | 815.4819 <sup>a</sup>  | C <sub>41</sub> H <sub>70</sub> O <sub>13</sub> | 8.35 | 2.3 | 291.63,234.11 | +HCOO,+Cl                          | 637.4298,475.3758,391.2840                             | (20S)-sanchinoside A3          | WG-5         | RG-13    |
| 96 | 887.5025 <sup>b</sup>  | C <sub>44</sub> H <sub>74</sub> O <sub>15</sub> | 8.42 | 1.7 | 300.49        | +HCOO,+Cl                          | 721.3485,637.4331,619.4179,476.3827,407.3294,391.2844  | PPT+2Glc+Ac                    | WG-8         | RG-11    |
| 97 | 1033.5600 <sup>b</sup> | C <sub>50</sub> H <sub>84</sub> O <sub>19</sub> | 8.52 | 1.1 | 329.14        | +HCOO,+Cl                          | 945.5431,637.4308,621.4000,475.3778,391.2846           | PPT+2Glc+Rha+Ac                |              | RG-7     |

|     |                        |                                                 |      |      |        |              |                                                                                    |                                   |       |       |
|-----|------------------------|-------------------------------------------------|------|------|--------|--------------|------------------------------------------------------------------------------------|-----------------------------------|-------|-------|
| 98  | 1155.5834              | C <sub>53</sub> H <sub>90</sub> O <sub>24</sub> | 8.50 | 2.6  | 357.60 | +HCOO,-H,+Cl | 1109.5782,765.4444,442.3394                                                        | Floralginsenoside Td or isomer    | WG-6  | RG-8  |
| 99  | 1007.5449              | C <sub>84</sub> H <sub>82</sub> O <sub>19</sub> | 8.61 | 1.7  | 327.87 | +HCOO, -H    | 961.5392,799.4811,673.3404,537.3416,375.2891.                                      | PPT+3Glc                          | WG-9  | RG-9  |
| 100 | 1155.5822              | C <sub>53</sub> H <sub>90</sub> O <sub>24</sub> | 8.66 | 1.5  | 362.98 | +HCOO,-H,+Cl | 968.4069,765.4435,609.2729,537.3414,441.3357                                       | floralginsenoside Td or isomer    | WG-9  | RG-8  |
| 101 | 1139.5873 <sup>b</sup> | C <sub>54</sub> H <sub>92</sub> O <sub>25</sub> | 8.68 | 1.6  | 353.68 | -H,+HCOO     | 781.4726,673.3405,475.3777,441.3365,375.2892                                       | Notoginsenoside C or isomer       | WG-7  | RG-7  |
| 102 | 771.4184 <sup>b</sup>  | C <sub>38</sub> H <sub>62</sub> O <sub>13</sub> | 8.77 | 1.5  | 280.67 | +HCOO,-H,+Cl | 725.4121,593.3673,559.3659,455.3520,389.1834.                                      | Notoginsenoside ST10 or isomer    | WG-11 | RG-11 |
| 103 | 1007.5449 <sup>a</sup> | C <sub>48</sub> H <sub>82</sub> O <sub>19</sub> | 8.92 | 1.7  | 328.29 | +HCOO,-H,+Cl | 961.5379,799.4833,637.4302,475.3783,391.2848                                       | vinaginsenoside R4                | WG-6  | RG-9  |
| 104 | 861.4865 <sup>b</sup>  | C <sub>42</sub> H <sub>72</sub> O <sub>15</sub> | 8.93 | 1.4  | 301.72 | +HCOO,-H,+Cl | 815.4786,653.4256,491.3721.415.3207,403.3222,401.3025                              | OT+2Glc (majonoside R1 or isomer) | WG-6  | RG-6  |
| 105 | 1137.5723              | C <sub>53</sub> H <sub>88</sub> O <sub>23</sub> | 8.97 | 2.2  | 343.63 | +HCOO,-H,+Cl | 1091.5633,765.4449,699.3924,635.4138,455.3528,387.3252                             | Yesanchinoside G or isomer        | WG-11 | RG-11 |
| 106 | 1139.5845              | C <sub>53</sub> H <sub>90</sub> O <sub>23</sub> | 8.98 | -1.0 | 354.75 | +HCOO,-H,+Cl | 1093.5863,1051.5294,961.5353,799.4809,779.4573,617.4056,538.3440,439.3534,391.2836 | PPT+3Glc+Xyl                      | WG-13 | RG-13 |
| 107 | 1049.5524 <sup>b</sup> | C <sub>50</sub> H <sub>84</sub> O <sub>20</sub> | 8.99 | -1.3 | 337.36 | +HCOO, -H    | 1003.5498,781.781.4729,609.2725,537.3438,457.3673,375.2894                         | PPT+3Glc+Ac                       | WG-10 | RG-10 |
| 108 | 829.4951 <sup>b</sup>  | C <sub>42</sub> H <sub>72</sub> O <sub>13</sub> | 9.15 | -0.5 | 298.86 | +HCOO, -H    | 783.4875,675.3572,475.3776,391.2835                                                | PPT+Glc+Rha                       | WG-4  |       |
| 109 | 1033.5610 <sup>b</sup> | C <sub>50</sub> H <sub>84</sub> O <sub>19</sub> | 9.16 | 2.1  | 332.26 | +HCOO,-H,+Cl | 945.5420,783.4886,637.4312,475.3783,391.2840                                       | PPT+2Glc+Rha+Ac                   | WG-7  | RG-7  |
| 110 | 1023.5401              | C <sub>48</sub> H <sub>82</sub> O <sub>20</sub> | 9.23 | 1.9  | 329.92 | +HCOO,-H, Cl | 977.5349,797.4683,765.4434,603.3893,441.3366,375.2901                              | Yesanchinoside B or isomer        | WG-6  | RG-6  |

|     |                        |                                                  |       |      |        |                                   |                                                                      |                                                  |       |       |
|-----|------------------------|--------------------------------------------------|-------|------|--------|-----------------------------------|----------------------------------------------------------------------|--------------------------------------------------|-------|-------|
| 111 | 1137.5725              | C <sub>53</sub> H <sub>88</sub> O <sub>23</sub>  | 9.39  | 2.3  | 353.14 | +HCOO,-H                          | 1091.4648,617.4027,473.2623,455.3523,<br>375.2895                    | Notoginsenoside I or<br>Yesaninoside G or isomer | WG-11 | RG-11 |
| 112 | 1007.5446 <sup>b</sup> | C <sub>48</sub> H <sub>82</sub> O <sub>19</sub>  | 9.49  | 1.5  | 309.48 | +HCOO,-H, Cl                      | 961.5359,750.3650,475.3776,391.2840                                  | PPT+3Glc                                         | WG-7  | RG-9  |
| 113 | 1371.6833 <sup>a</sup> | C <sub>64</sub> H <sub>108</sub> O <sub>31</sub> | 9.50  | 2.3  | 387.94 | -H,+HCOO                          | 1239.6442,1107.5894,945.5444,783.4902<br>,621.4354,459.3834,375.2887 | Notoginsenoside T                                | WG-9  | RG-7  |
| 114 | 1117.5452              | C <sub>53</sub> H <sub>84</sub> O <sub>22</sub>  | 9.62  | 1.4  | 347.97 | -H                                | 793.4368,613.3728,569.3834,455.3517,4<br>53.3361                     | OA+3Glc+GlcA                                     | WG-10 | RG-10 |
| 115 | 1065.5471 <sup>b</sup> | C <sub>50</sub> H <sub>84</sub> O <sub>21</sub>  | 9.65  | -1.5 | 340.10 | +HCOO, -H                         | 797.4672,765.4428,613.3728,455.3510,4<br>41.3353                     | Floralginsenoside G or isomer                    | WG-6  | RG-10 |
| 116 | 1007.5446              | C <sub>48</sub> H <sub>82</sub> O <sub>19</sub>  | 9.68  | 1.4  | 316.09 | +HCOO, -H                         | 961.5362,799.4798,475.377,391.2840                                   | PPT+3Glc                                         | WG-9  | RG-9  |
| 117 | 1049.5538 <sup>b</sup> | C <sub>50</sub> H <sub>84</sub> O <sub>20</sub>  | 9.70  | 0.0  | 336.51 | +HCOO, -H                         | 1003.5448,783.4857,569.3837,537.3503,<br>475.3786,391.2845           | PPT+3Glc+Ac                                      | WG-10 | RG-10 |
| 118 | 1417.6886              | C <sub>64</sub> H <sub>108</sub> O <sub>31</sub> | 9.93  | 2.1  | 376.01 | +HCOO,-H,+C<br>H <sub>3</sub> COO | 1107.5962,945.5448,783.4890,621.4367,<br>537.3425,459.3833           | PPD+4Glc+2Xyl                                    | WG-12 | RG-11 |
| 119 | 1315.6570              | C <sub>60</sub> H <sub>102</sub> O <sub>28</sub> | 9.95  | 2.3  | 361.99 | +HCOO,-H,+Cl                      | 1269.6512,1108.6015,945.5448,783.4889<br>,621.4367,459.3833,375.2890 | PPD+5GLc                                         | WG-11 | RG-11 |
| 120 | 977.5347               | C <sub>47</sub> H <sub>80</sub> O <sub>18</sub>  | 10.01 | 2.1  | 311.19 | +HCOO,-H,+Cl                      | 931.5280,751.3716,475.3782,391.2842                                  | PPT+2Glc+Xyl                                     | WG-8  | RG-9  |
| 121 | 845.4921 <sup>a</sup>  | C <sub>42</sub> H <sub>72</sub> O <sub>14</sub>  | 10.12 | 1.7  | 303.68 | +HCOO,-H                          | 799.4836,637.4310,475.3781,391.2842                                  | Ginsenoside Rf                                   | WG-6  | RG-6  |
| 122 | 845.4921 <sup>a</sup>  | C <sub>42</sub> H <sub>72</sub> O <sub>14</sub>  | 10.24 | 2.0  | 297.06 | +HCOO,-H                          | 799.4840,653.4258,491.3728,415.3207,3<br>64.9146                     | (24R)-Pseudoginsenoside F11                      | WG-9  | RG-7  |
| 123 | 1285.6449 <sup>a</sup> | C <sub>59</sub> H <sub>100</sub> O <sub>27</sub> | 10.29 | 1.2  | 366.16 | +HCOO,-H,+Cl                      | 1239.6362,1107.59109,998.4504,701.427<br>3,613.3732,551.3714         | Notoginsenoside R4                               | WG-11 | RG-7  |



|     |                        |                                                  |       |     |        |              |                                                                 |                                       |       |       |
|-----|------------------------|--------------------------------------------------|-------|-----|--------|--------------|-----------------------------------------------------------------|---------------------------------------|-------|-------|
| 124 | 845.4924               | C <sub>42</sub> H <sub>72</sub> O <sub>14</sub>  | 10.49 | 2.3 | 305.83 | +HCOO,-H,+Cl | 799.4847,637.4315,475.3786,391.2845                             | PPT+2Glc                              | WG-6  | RG-6  |
|     |                        |                                                  |       |     |        |              | 1341.6709,1209.6289,1077.5855,945.53                            |                                       |       |       |
| 125 | 1387.6779              | C <sub>63</sub> H <sub>106</sub> O <sub>30</sub> | 10.49 | 2.0 | 376.85 | +HCOO,-H,+Cl | 92,783.4888,621.4358,459.3830,375.2893                          | PPD+3Glc+3Xyl                         | WG-6  | RG-11 |
| 126 | 1285.6461              | C <sub>59</sub> H <sub>100</sub> O <sub>27</sub> | 10.50 | 2.1 | 360.82 | +HCOO,-H     | 1239.6413,1077.5876,783.4888,621.4358,459.3834,375.2890         | PPD+4Glc+Xyl                          | WG-12 |       |
| 127 | 1087.5362 <sup>b</sup> | C <sub>53</sub> H <sub>84</sub> O <sub>23</sub>  | 10.54 | 2.9 | 341.64 | -H           | 763.4290,613.3725,569.3844,455.3519,437.3417                    | OA+GlurA+2Glc+Xyl                     | WG-10 | RG-10 |
| 128 | 699.4337 <sup>a</sup>  | C <sub>36</sub> H <sub>62</sub> O <sub>10</sub>  | 10.57 | 1.8 | 273.90 | +HCOO        | 637.4316,391.2845                                               | Pseudoginsenoside Rt5                 | WG-6  | RG-6  |
| 129 | 843.4759               | C <sub>42</sub> H <sub>70</sub> O <sub>14</sub>  | 10.62 | 1.3 | 299.44 | -H,+HCOO,+Cl | 797.4702,455.3501,389.2680                                      | 12,23-Eproxyginsenoside Rg1 or isomer | WG-5  | RG-10 |
| 130 | 1325.6409              | C <sub>62</sub> H <sub>102</sub> O <sub>30</sub> | 10.81 | 2.0 | 369.02 | -H           | 945.5412,783.4893,621.4356,459.3833,375.2892                    | PPD+4Glc+Xyl+Mal                      | WG-10 | RG-10 |
| 131 | 1269.6511              | C <sub>60</sub> H <sub>102</sub> O <sub>28</sub> | 10.92 | 2.1 | 362.08 | -H,+HCOO,+Cl | 1107.5959,945.5416,837.4978,783.4895,621.4359,459.3830,375.2892 | PPD+5Glc                              | WG-12 | RG-10 |
| 132 | 947.5236               | C <sub>46</sub> H <sub>78</sub> O <sub>17</sub>  | 10.94 | 1.6 | 316.77 | +HCOO,-H,+Cl | 901.5181,475.3777                                               | PPT+Glc+2Xyl                          | WG-2  | RG-3  |
| 133 | 887.5020 <sup>b</sup>  | C <sub>44</sub> H <sub>74</sub> O <sub>15</sub>  | 11.00 | 1.2 | 314.19 | +HCOO,-H     | 841.4945,799.4841,637.4309,619.4201,475.3781,391.2842           | PPT+2Glc+Ac                           | WG-7  | RG-7  |
| 134 | 815.4811 <sup>a</sup>  | C <sub>41</sub> H <sub>70</sub> O <sub>13</sub>  | 11.01 | 1.5 | 296.57 | +HCOO,-H,+Cl | 769.4755,459.3465,391.2845                                      | Notoginsenoside R2                    | WG-12 | RG-6  |
| 135 | 1285.6463 <sup>b</sup> | C <sub>59</sub> H <sub>100</sub> O <sub>27</sub> | 11.17 | 2.2 | 365.05 | +HCOO,-H,+Cl | 1239.6405,1107.5946,946.5455,537.3423,459.3833,375.2894         | PPD+4Glc+Xyl                          | WG-9  | RG-7  |
| 136 | 1341.6717 <sup>b</sup> | C <sub>61</sub> H <sub>102</sub> O <sub>28</sub> | 11.21 | 1.5 | 377.06 | +CH3COO      | 1077.5847,945.5430,783.4879,621.4349                            | PPT+4Glc+Xyl+Ac                       | WG-8  | RG-8  |
| 137 | 1137.6093              | C <sub>54</sub> H <sub>92</sub> O <sub>22</sub>  | 11.23 | 2.7 | 342.01 | +HCOO,-H     | 1077.5869,945.5382,783.4888,621.4361,                           | PPD+3Glc+Rha (Gypenoside              | WG-9  | RG-10 |

|     |                        |                                                  |       |      |                      |                       |                                                         |  |                                                         |       |       |
|-----|------------------------|--------------------------------------------------|-------|------|----------------------|-----------------------|---------------------------------------------------------|--|---------------------------------------------------------|-------|-------|
|     |                        |                                                  |       |      |                      |                       | 459.3833,375.2892                                       |  | V or isomer)                                            |       |       |
| 138 | 815.4805               | C <sub>41</sub> H <sub>70</sub> O <sub>13</sub>  | 11.29 | 0.8  | 296.16               | +HCOO,-H,+Cl          | 769.4722,637.4296,475.3780                              |  | PPT+Glc+Xyl                                             | WG-4  | RG-4  |
| 139 | 771.4191               | C <sub>38</sub> H <sub>62</sub> O <sub>13</sub>  | 11.51 | 1.1  | 285.12               | +HCOO,-H,+Cl          | 725.4126,657.3634,496.0512,353.2840                     |  | Notoginsenoside ST10 or isomer                          |       | RG-11 |
| 140 | 887.5026 <sup>b</sup>  | C <sub>44</sub> H <sub>74</sub> O <sub>15</sub>  | 11.55 | -1.9 | 310.02               | +HCOO,-H              | 841.4975,799.4856,637.4315,475.3782,391.2845            |  | PPT+2Glc+Ac                                             | WG-6  | RG-6  |
| 141 | 1087.5363              | C <sub>53</sub> H <sub>84</sub> O <sub>23</sub>  | 11.56 | 3.0  | 331.81/259.87/211.69 | -H                    | 793.4385,613.3739,569.3847,455.3524,437.3418            |  | OA+GlurA+2GlurA+Xyl (Stipuleanoside R2 or isomer)       |       | RG-10 |
| 142 | 1105.5828 <sup>a</sup> | C <sub>54</sub> H <sub>90</sub> O <sub>23</sub>  | 11.58 | 2.5  | 343.31               | -H,+HCOO              | 945.5422,837.4066,766.4820,496.0513,460.3880,383.1183   |  | 5,6-Didehydroginsenoside Rb1                            | WG-11 | RG-10 |
| 143 | 989.5343               | C <sub>48</sub> H <sub>80</sub> O <sub>18</sub>  | 11.60 | 1.7  | 328.92               | +HCOO,-H,+Cl          | 943.5296,799.4863,457.3678,391.2839                     |  | Didehydro-PPT+2Glc                                      | WG-7  | RG-7  |
| 144 | 887.5023 <sup>b</sup>  | C <sub>44</sub> H <sub>74</sub> O <sub>15</sub>  | 11.61 | 1.5  | 310.48               | +HCOO,-H              | 799.4839,637.4306,475.3780,391.2845                     |  | PPT+2Glc+Ac                                             | WG-7  | RG-7  |
| 145 | 1255.6359              | C <sub>58</sub> H <sub>98</sub> O <sub>26</sub>  | 11.73 | 2.5  | 352.95               | +HCOO,+Cl,+C<br>H3COO | 1209.6315,1100.4875,784.3861,537.3428,375.2900          |  | PPD+3Glc+2Xyl                                           | WG-11 | RG-10 |
| 146 | 1315.6557              | C <sub>60</sub> H <sub>102</sub> O <sub>28</sub> | 11.76 | 2.1  | 385.70               | +HCOO,-H              | 1269.6537,945.5417,621.4366,459.3834,375.2894           |  | PPD+5Glc                                                | WG-12 | RG-11 |
| 147 | 815.4805 <sup>a</sup>  | C <sub>41</sub> H <sub>70</sub> O <sub>13</sub>  | 11.78 | 0.8  | 300.01               | +HCOO,+Cl             | 783.4876,529.2978,391.2848                              |  | (20R)-Notoginsenoside R2                                | WG-4  | RG-7  |
| 148 | 1285.6463              | C <sub>59</sub> H <sub>100</sub> O <sub>27</sub> | 11.81 | 2.3  | 359.97               | +HCOO,-H,+Cl          | 1239.6376,1077.5868,945.5417,717.3636,621.4366,459.3834 |  | PPD+4Glc+Xyl                                            | WG-12 | RG-10 |
| 149 | 955.4988 <sup>b</sup>  | C <sub>48</sub> H <sub>76</sub> O <sub>19</sub>  | 11.92 | 0.8  | 320.19               | -H,+Cl                | 793.4376,731.62,455.3511,543.3368                       |  | OA+2Glc+GlurA (Spinasaponin A 28-O-glucoside or isomer) | WG-7  | RG-7  |
| 150 | 1059.5761              | C <sub>52</sub> H <sub>86</sub> O <sub>19</sub>  | 12.01 | 1.5  | 338.67               | +HCOO,-H,+Cl          | 945.5415,783.4871,553.3364,475.3780,3                   |  | PPD+3Glc+Butenoyl                                       | WG-7  | RG-8  |

|     |                        |                                                  |       |      |        |                                    |                                                                                             |                                                            |       |       | 91.2844 |
|-----|------------------------|--------------------------------------------------|-------|------|--------|------------------------------------|---------------------------------------------------------------------------------------------|------------------------------------------------------------|-------|-------|---------|
| 151 | 829.4975 <sup>a</sup>  | C <sub>42</sub> H <sub>72</sub> O <sub>13</sub>  | 12.06 | 2.4  | 298.80 | +HCOO,+H                           | 783.4896,637.4316,475.37855,391.2846                                                        | 20S-Ginsenoside Rg2                                        | WG-4  | RG-7  |         |
| 152 | 1255.6346 <sup>a</sup> | C <sub>58</sub> H <sub>98</sub> O <sub>26</sub>  | 12.11 | 2.4  | 353.94 | +HCOO,-H,+Cl                       | 1209.6265,1077.5853,945.5422,783.488<br>0,621.4368,459.3833,375.2895                        | Ginsenoside Ra2                                            | WG-11 | RG-6  |         |
| 153 | 857.4917               | C <sub>43</sub> H <sub>72</sub> O <sub>14</sub>  | 12.24 | 1.6  | 305.68 | +HCOO,+H                           | 811.4861,637.4321,537.3430,475.3784,3<br>91.2841                                            | PPT+Glc+Xyl+Ac<br>(20(S)-Sanchirrhinoside A2 or<br>isomer) | WG-6  | RG-6  |         |
| 154 | 1255.6455 <sup>b</sup> | C <sub>58</sub> H <sub>98</sub> O <sub>26</sub>  | 12.26 | 2.1  | 357.24 | +HCOO,-H,+Cl                       | 1077.5840,783.4886,621.4361,459.3829,<br>375.2891                                           | PPD+3Glc+2Xyl                                              | WG-9  | RG-7  |         |
| 155 | 843.4756               | C <sub>42</sub> H <sub>70</sub> O <sub>14</sub>  | 12.32 | 0.9  | 299.44 | +HCOO,+H                           | 473.3646,459.3825                                                                           | 12,23-Eproxyginsenoside Rg1<br>or isomer                   | WG-5  | RG-6  |         |
| 156 | 683.4380 <sup>a</sup>  | C <sub>36</sub> H <sub>62</sub> O <sub>9</sub>   | 12.34 | 0.7  | 275.26 | +HCOO,+Cl                          | 638.2065,459.3825,387.3274                                                                  | Ginsenoside Rh1                                            | WG-11 | RG-11 |         |
| 157 | 1285.6557              | C <sub>59</sub> H <sub>100</sub> O <sub>27</sub> | 12.42 | 1.80 | 361.41 | +HCOO,+H                           | 1239.6399,731.4388,659.4171,569.3836,<br>497.3624,455.3506,423.3249                         | PPD+4Glc+Xyl                                               | WG-1  | RG-7  |         |
| 158 | 815.4801 <sup>a</sup>  | C <sub>41</sub> H <sub>70</sub> O <sub>13</sub>  | 12.47 | 0.3  | 296.94 | +HCOO,+Cl,+C<br>H <sub>3</sub> COO | 783.4888,475.3779,391.2840                                                                  | Ginsenoside F3                                             | WG-4  | RG-7  |         |
| 159 | 829.4971 <sup>b</sup>  | C <sub>42</sub> H <sub>72</sub> O <sub>13</sub>  | 12.50 | 1.9  | 303.19 | +HCOO,-H,+Cl                       | 529.2969,475.3790,391.2842                                                                  | PPT+Rha+Glc                                                | WG-6  | RG-9  |         |
| 160 | 1327.6497 <sup>b</sup> | C <sub>61</sub> H <sub>102</sub> O <sub>28</sub> | 12.55 | -3.2 | 369.75 | +HCOO,+H                           | 1281.6556,1239.6366,1107.5955,945.54<br>22,783.4887,621.4360,537.3422,459.383<br>3,375.2895 | PPD+4Glc+Xyl+Ac<br>(Yesanchinoside J or isomer)            | WG-9  | RG-10 |         |
| 161 | 1325.6417              | C <sub>62</sub> H <sub>102</sub> O <sub>30</sub> | 12.55 | 2.6  | 368.02 | -H                                 | 1091.5947,765.4780,605.4045,456.3538,<br>391.2839                                           | PPD+4Glc+Xyl+Mal                                           | WG-10 | RG-10 |         |
| 162 | 1153.6038 <sup>a</sup> | C <sub>54</sub> H <sub>92</sub> O <sub>23</sub>  | 12.59 | 2.3  | 350.76 | +HCOO,-H,+Cl                       | 1107.5952,945.5423,783.4891,621.4363,<br>459.3833,375.2892.                                 | Ginsenoside Rb1                                            | WG-11 | RG-6  |         |

|     |                        |                                                 |       |        |                          |              |                                                                  |                                                    |       |       |
|-----|------------------------|-------------------------------------------------|-------|--------|--------------------------|--------------|------------------------------------------------------------------|----------------------------------------------------|-------|-------|
| 163 | 1255.6366 <sup>b</sup> | C <sub>58</sub> H <sub>98</sub> O <sub>26</sub> | 12.63 | 3.0    | 357.65                   | +HCOO,+H     | 803.4080,783.4889,621.4370,459.3833                              | PPD+3Glc+2Xyl                                      | WG-2  | RG-7  |
| 164 | 955.4917               | C <sub>48</sub> H <sub>76</sub> O <sub>19</sub> | 12.82 | 0.9    | 253.00                   | -H           | 794.4403,623.3015,569.3835,497.3627,455.3515,409.3462            | OA+2Glc+GlurA                                      | WG-7  | RG-8  |
| 165 | 1297.6395 <sup>b</sup> | C <sub>60</sub> H <sub>99</sub> O <sub>27</sub> | 12.88 | -3.0   | 358.41                   | +HCOO, -H    | 1209.6278,1077.5847,945.5436,783.4894,621.4363,459.3832,375.2893 | PPD+3Glc+Xyl+Xyl+Ac<br>(Ginsenoside Ra5 or isomer) | WG-11 | RG-10 |
| 166 | 815.4815               | C <sub>41</sub> H <sub>70</sub> O <sub>13</sub> | 13.12 | 2.1    | 295.97                   | +HCOO, -H    | 769.4752,475.3778,391.2844                                       | PPT+Glc+Xyl                                        |       | RG-6  |
| 167 | 683.4380 <sup>a</sup>  | C <sub>36</sub> H <sub>62</sub> O <sub>9</sub>  | 13.23 | 0.7    | 278.39                   | +HCOO, -Cl   | 466.0403,407.0273,353.1068                                       | (20R)-Ginsenoside Rh1                              | WG-11 | RG-11 |
| 168 | 1193.5981 <sup>a</sup> | C <sub>57</sub> H <sub>94</sub> O <sub>26</sub> | 13.39 | 1.7    | 346.20                   | -H           | 1107.5946,945.5393,783.4894,621.4359,459.3832,375.2894           | Malonyl-ginsenoside Rb1                            | WG-9  | RG-6  |
| 169 | 1195.6088              | C <sub>56</sub> H <sub>94</sub> O <sub>24</sub> | 13.39 | -2.4   | 351.00                   | +HCOO, -H    | 1149.6080,1107.5946,998.4545,621.4359,537.3423,459.3832,375.2894 | PPD+4Glc+Ac                                        | WG-9  | RG-6  |
| 170 | 871.5071 <sup>b</sup>  | C <sub>44</sub> H <sub>74</sub> O <sub>14</sub> | 13.42 | 1.2    | 306.55                   | +HCOO, -H    | 783.4904,459.3832,391.2842                                       | PPD+2Glc+Ac                                        | WG-6  | RG-6  |
| 171 | 1087.5349 <sup>b</sup> | C <sub>53</sub> H <sub>84</sub> O <sub>23</sub> | 13.74 | 1.7    | 217.89                   | -H           | 955.4885,794.4393,723.4400,570.3863,455.3512,423.3251            | OA+2Glc+Xyl+GlurA<br>(Tipuleanoside R2 or isomer)  | WG-7  | RG-7  |
| 172 | 955.4981 <sup>a</sup>  | C <sub>48</sub> H <sub>76</sub> O <sub>19</sub> | 13.80 | 1.0    | 249.54/321.19<br>/198.64 | -H, +Cl      | 793.4360,613.3727,455.3513                                       | Ginsenoside Ro                                     | WG-7  | RG-6  |
| 173 | 665.4282               | C <sub>36</sub> H <sub>60</sub> O <sub>8</sub>  | 13.83 | 1.8    | 265.12                   | +HCOO        | 457.3650,391.2852                                                | Dedihydro-PPD+Glc                                  | WG-4  | RG-5  |
| 174 | 725.4492 <sup>b</sup>  | C <sub>38</sub> H <sub>64</sub> O <sub>10</sub> | 13.83 | 1.4    | 282.90                   | +HCOO, -H    | 679.4439,619.4186,475.3784,391.2852                              | PPT+Glc+Ac                                         | WG-5  | RG-5  |
| 175 | 1123.5919 <sup>a</sup> | C <sub>53</sub> H <sub>90</sub> O <sub>22</sub> | 13.91 | 1.31.4 | 343.83/267.28            | +HCOO,-H,+Cl | 1077.5839,945.5413,783.4879,621.4355,459.3826,375.2889           | Ginsenoside Rc                                     | WG-10 | RG-6  |
| 176 | 991.5491               | C <sub>48</sub> H <sub>82</sub> O <sub>18</sub> | 13.91 | 0.8    | 327.24                   | +HCOO, -H    | 945.5412,783.4880,621.4354,459.3826                              | PPD+3Glc                                           | WG-10 | RG-7  |

|     |                        |                                                  |       |      |                          |              |                                                                             |                                                  |       |       |
|-----|------------------------|--------------------------------------------------|-------|------|--------------------------|--------------|-----------------------------------------------------------------------------|--------------------------------------------------|-------|-------|
| 177 | 1209.6346              | C <sub>58</sub> H <sub>98</sub> O <sub>26</sub>  | 13.94 | 1.6  | 352.33                   | -H,+HCOO,+Cl | 1209.6276,1077.5844,945.5413,783.488<br>9,621.4359,459.3826                 | Ginsenoside Ra1                                  | WG-11 | RG-7  |
| 178 | 1193.6051 <sup>b</sup> | C <sub>57</sub> H <sub>94</sub> O <sub>26</sub>  | 14.08 | 1.5  | 337.44                   | -H           | 1107.6000,799.4329,637.6524                                                 | PPD+4Glc+Mal                                     | WG-7  | RG-7  |
| 179 | 1195.6086 <sup>b</sup> | C <sub>56</sub> H <sub>94</sub> O <sub>24</sub>  | 14.08 | -2.6 | 339.82                   | +HCOO, -H    | 1149.6082,1107.6000,799.4329,637.652<br>4                                   | PPD+4Glc+Ac                                      | WG-7  | RG-7  |
| 180 | 1193.5984 <sup>b</sup> | C <sub>57</sub> H <sub>94</sub> O <sub>26</sub>  | 14.32 | 2.0  | 346.19/266.99            | -H           | 1107.5965,945.5418,783.4898,621.4356,<br>459.3833375.2897                   | PPD+4Glc+Mal<br>(m-Ginsenoside Rb1 or<br>isomer) | WG-11 | RG-7  |
| 181 | 1387.6782              | C <sub>63</sub> H <sub>106</sub> O <sub>30</sub> | 14.51 | 2.2  | 375.73                   | +HCOO,-H,+Cl | 1077.5866,945.5409,783.4892,621.4363,<br>459.3831,375.2897                  | PPD+3Glc+3Xyl                                    | WG-9  | RG-7  |
| 182 | 887.5020 <sup>b</sup>  | C <sub>44</sub> H <sub>74</sub> O <sub>15</sub>  | 14.58 | 1.2  | 312.05                   | +HCOO,-H,+Cl | 799.4809,613.3743,475.3783,391.2847<br>1209.5394,1191.6166,1077.5848,945.54 | PPT+2Glc+Ac                                      | WG-11 | RG-11 |
| 183 | 1255.6348              | C <sub>58</sub> H <sub>98</sub> O <sub>26</sub>  | 14.78 | 1.6  | 351.20                   | +HCOO,-H,+Cl | 19,783.4884,603.4252,441.3724,375.289<br>5                                  | PPD+3Glc+2Xyl                                    | WG-11 | RG-13 |
| 184 | 1297.6388              | C <sub>60</sub> H <sub>99</sub> O <sub>27</sub>  | 14.81 | -3.5 | 365.55                   | +HCOO,-H,+Cl | 1209.6276,1077.5844,945.5419,783.488<br>4,621.4361,459.3832,375.2895        | PPD+3Glc+2Xyl+Ac<br>(Ginsenoside Ra5 or isomer)  | WG-11 | RG-10 |
| 185 | 1165.5989 <sup>b</sup> | C <sub>55</sub> H <sub>92</sub> O <sub>23</sub>  | 14.92 | -1.9 | 348.25/262.28            | +HCOO,-H     | 1119.5960,945.5422,783.4892,621.4363,<br>459.3832,375.2893                  | PPD+3Glc+Xyl+Ac                                  | WG-10 | RG-10 |
| 186 | 925.4812               | C <sub>47</sub> H <sub>74</sub> O <sub>18</sub>  | 14.95 | 1.0  | 312.36/245.48<br>/195.32 | -H,+Cl       | 763.4263,497.3624,455.3514,437.3412                                         | OA+Glc+Xyl+GlurA                                 | WG-7  | RG-7  |
| 187 | 1163.5878 <sup>a</sup> | C <sub>56</sub> H <sub>92</sub> O <sub>25</sub>  | 14.93 | 2.0  | 345.13/262.12            | -H           | 1077.5847,945.5423,783.4892,621.4363,<br>459.3835,375.2891                  | m-Ginsenoside Rc                                 | WG-9  | RG-6  |
| 188 | 1193.5982 <sup>b</sup> | C <sub>57</sub> H <sub>94</sub> O <sub>26</sub>  | 15.00 | 1.8  | 360.22                   | -H           | 1107.5951,945.5420,705.3493,459.3831,<br>375.2893                           | PPD+4Glc+Mal                                     | WG-10 | RG-10 |

|     |                        |                                                 |       |      |                          |              |                                                                      |                                                    |       |       |
|-----|------------------------|-------------------------------------------------|-------|------|--------------------------|--------------|----------------------------------------------------------------------|----------------------------------------------------|-------|-------|
| 189 | 785.4700               | C <sub>40</sub> H <sub>68</sub> O <sub>12</sub> | 15.20 | 1.0  | 286.97                   | +HCOO,-H     | 739.4645,391.2848                                                    | PPT+2Xyl                                           | WG-3  | RG-3  |
| 190 | 1209.6293              | C <sub>58</sub> H <sub>98</sub> O <sub>26</sub> | 15.32 | 1.6  | 354.77                   | -H,+HCOO,+Cl | 1047.5754,945.5421,843.4099,621.4356,<br>459.3833,375.2894           | PPD+3Glc+2Xyl                                      | WG-11 | RG-13 |
| 191 | 1123.5925 <sup>a</sup> | C <sub>53</sub> H <sub>90</sub> O <sub>22</sub> | 15.48 | 1.7  | 354.84                   | +HCOO,-H     | 1077.5844,945.5413,783.4892,621.4355,<br>459.3838,375.2892           | Ginsenoside Rb2                                    | WG-10 | RG-6  |
| 192 | 725.4496               | C <sub>38</sub> H <sub>64</sub> O <sub>10</sub> | 15.55 | 2.0  | 285.75                   | +HCOO,-H     | 475.3778                                                             | PPT+Glc+Ac (6'-acetyl<br>Ginsenoside F1 or isomer) | WG-3  | RG-5  |
| 193 | 1195.6094 <sup>b</sup> | C <sub>56</sub> H <sub>94</sub> O <sub>24</sub> | 15.60 | -1.9 | 357.96                   | -H,+HCOO,+Cl | 1149.6053,987.5559,783.4886,621.4358,<br>459.3831,375.2893           | PPD+4Glc+Ac                                        | WG-11 | RG-8  |
| 194 | 1193.6033              | C <sub>57</sub> H <sub>94</sub> O <sub>26</sub> | 15.60 | 1.5  | 359.30/296.93            | -H           | 1107.5952,945.5418,783.4886,621.4358,<br>459.3831,375.2893           | PPD+4Glc+Mal                                       | WG-11 | RG-8  |
| 195 | 1165.5995 <sup>b</sup> | C <sub>55</sub> H <sub>92</sub> O <sub>23</sub> | 15.87 | -1.4 | 351.53                   | +HCOO,-H     | 783.4908,621.4359,519.3334,459.3833,3<br>75.2897                     | PPD+3Glc+Xyl+Ac                                    | WG-9  | RG-8  |
| 196 | 1195.6134 <sup>b</sup> | C <sub>56</sub> H <sub>94</sub> O <sub>24</sub> | 15.93 | 1.4  | 358.68                   | +HCOO,+Cl    | 1107.5950,927.5252,719.3727,459.3836                                 | PPD+4Glc+Xyl+Ac                                    |       | RG-10 |
| 197 | 925.4809 <sup>a</sup>  | C <sub>47</sub> H <sub>74</sub> O <sub>18</sub> | 15.99 | 0.7  | 313.13/246.29<br>/195.44 | -H,+Cl       | 763.4263,613.3736,497.3623,455.3513,4<br>37.3413                     | Pseudoginsenoside Rt1                              | WG-7  | RG-7  |
| 198 | 1123.5917 <sup>a</sup> | C <sub>53</sub> H <sub>90</sub> O <sub>22</sub> | 16.09 | 1.0  | 351.36                   | +HCOO,-H,+Cl | 1077.5838,945.5414,783.4882,621.4358,<br>459.3824,375.288            | Ginsenoside Rb3                                    | WG-11 | RG-6  |
| 199 | 843.4766               | C <sub>42</sub> H <sub>70</sub> O <sub>14</sub> | 16.15 | 2.2  | 305.61                   | +HCOO,-H     | 627.334,439.3517,391.2826                                            | 12,23-Eproxyginsenoside Rg1<br>or isomer           | WG-11 | RG-11 |
| 200 | 1195.6160 <sup>b</sup> | C <sub>56</sub> H <sub>94</sub> O <sub>24</sub> | 16.25 | -0.9 | 357.65                   | +HCOO,-H     | 1107.5957,945.5412,783.4870,621.4361,<br>459.3830,375.2893           | PPD+4Glc+Ac                                        | WG-10 | RG-10 |
| 201 | 1193.5986              | C <sub>57</sub> H <sub>94</sub> O <sub>26</sub> | 16.26 | 2.1  | 355.50/285.41            | -H           | 1107.5958,1089.5844,945.5415,783.488<br>8,621.4366,459.3834,375.2892 | PPD+4Glc+Mal<br>(m-Ginsenoside Rb1 or<br>isomer)   | WG-10 | RG-10 |

|     |                        |                                                  |       |      |                           |              |                                                                  |                                                   |       |       |
|-----|------------------------|--------------------------------------------------|-------|------|---------------------------|--------------|------------------------------------------------------------------|---------------------------------------------------|-------|-------|
| 202 | 683.4380 <sup>a</sup>  | C <sub>36</sub> H <sub>62</sub> O <sub>9</sub>   | 16.29 | 0.7  | 271.06                    | +HCOO        | 637.4306,475.3681,391.2841                                       | 20(S)-Ginsenoside F1                              |       | RG-6  |
| 203 | 1297.6402 <sup>b</sup> | C <sub>60</sub> H <sub>100</sub> O <sub>27</sub> | 16.33 | -2.5 | 364.49                    | +HCOO,-H     | 1077.5847,783.4884,621.4348,459.3833                             | PPD+3Glc+2Xyl+Ac                                  | WG-9  | RG-8  |
| 204 | 1165.6003 <sup>b</sup> | C <sub>55</sub> H <sub>92</sub> O <sub>23</sub>  | 16.59 | -0.7 | 355.54                    | +HCOO,-H     | 783.4815,459.3835,375.2892                                       | PPD+3Glc+Xyl+Ac                                   | WG-12 | RG-6  |
| 205 | 1163.5878 <sup>a</sup> | C <sub>56</sub> H <sub>92</sub> O <sub>25</sub>  | 16.62 | 2.0  | 354.48,264.96.            | -H           | 1077.5842,945.5422,783.4891,621.4361,459.3832,375.2896           | m-Ginsenoside Rb2                                 | WG-10 | RG-6  |
| 206 | 1255.6356              | C <sub>58</sub> H <sub>98</sub> O <sub>26</sub>  | 16.67 | 2.2  | 358.85                    | +HCOO,-H,+Cl | 1209.6266,1077.5853,783.48855,621.4365,460.3860                  | PPD+3Glc+2Xyl                                     | WG-9  | RG-7  |
| 207 | 925.4816               | C <sub>47</sub> H <sub>74</sub> O <sub>18</sub>  | 16.70 | 1.5  | 319.28/246.42<br>/200.232 | -H,+Cl       | 745.3251,569.3838,497.3626,455.3521,437.3414                     | Chikusetsusaponin IV                              | WG-6  | RG-6  |
| 208 | 989.5355               | C <sub>48</sub> H <sub>80</sub> O <sub>18</sub>  | 17.03 | 2.9  | 325.50                    | +HCOO,-H,+Cl | 943.5294,673.3388,457.3694                                       | 5,6-Dedihydro-PPD+3Glc                            | WG-8  | RG-10 |
| 209 | 1297.6465 <sup>b</sup> | C <sub>60</sub> H <sub>100</sub> O <sub>27</sub> | 17.09 | 2.4  | 367.79                    | +HCOO,-H,+Cl | 1251.6398,1077.5847,945.5426,783.4889,621.4366,537.3429,459.3836 | PPD+3Glc+2Xyl+Ac                                  | WG-11 | RG-11 |
| 210 | 793.4393 <sup>b</sup>  | C <sub>42</sub> H <sub>66</sub> O <sub>14</sub>  | 17.12 | 1.6  | 303.83                    | -H           | 455.3517                                                         | OA+Glc+GluA                                       |       | RG-9  |
| 211 | 1163.5873              | C <sub>56</sub> H <sub>92</sub> O <sub>25</sub>  | 17.22 | 1.6  | 349.12/266.11             | -H           | 1077.5843,945.5419,783.4884,621.4359,459.3830,375.2893           | PPD+3Glc+Xyl+Mal<br>(m-Ginsenoside Rb3 or isomer) | WG-10 | RG-11 |
| 212 | 857.4915               | C <sub>43</sub> H <sub>72</sub> O <sub>14</sub>  | 17.22 | 1.3  | 304.65                    | +HCOO,-H,+Cl | 811.4860,769.4738,619.4170,475.3780,391.2839                     | PPT+Glc+Xyl+Ac                                    |       | RG-3  |
| 213 | 1251.6384 <sup>b</sup> | C <sub>60</sub> H <sub>100</sub> O <sub>27</sub> | 17.39 | 0.4  | 358.13/236.30             | -H,+HCOO     | 1077.5856,783.4884,621.4365,459.3830,375.2894                    | PPD+3Glc+2Xyl+Ac                                  | WG-11 | RG-11 |
| 214 | 1163.5881              | C <sub>56</sub> H <sub>92</sub> O <sub>25</sub>  | 17.44 | 2.2  | 350.94/285.57             | -H           | 1077.5857,945.5420,783.4895,621.4357,459.3835,375.2897           | PPD+3Glc+Xyl+Mal                                  | WG-9  | RG-11 |
| 215 | 1165.6006 <sup>b</sup> | C <sub>55</sub> H <sub>92</sub> O <sub>23</sub>  | 17.44 | -0.4 | 351.92                    | +HCOO,-H,+Cl | 1077.5857,945.5420,783.4895,621.4356,                            | PPD+3Glc+Xyl+Ac                                   | WG-9  |       |

|     |                        |                                                  |       |      |                          |              |                                                                      |                        |       |       |  |
|-----|------------------------|--------------------------------------------------|-------|------|--------------------------|--------------|----------------------------------------------------------------------|------------------------|-------|-------|--|
|     |                        |                                                  |       |      |                          |              |                                                                      | 459.3835,375.2896      |       |       |  |
| 216 | 1327.6557              | C <sub>61</sub> H <sub>102</sub> O <sub>28</sub> | 17.58 | 1.3  | 370.61                   | +HCOO,-H,+Cl | 1281.6500,1239.6394,1107.5947,945.54<br>13621.4352,459               | PPD+4Glc+Xyl+Ac        | WG-11 | RG-11 |  |
| 217 | 1165.6012 <sup>b</sup> | C <sub>55</sub> H <sub>92</sub> O <sub>23</sub>  | 17.80 | 0.1  | 355.97                   | +HCOO,-H,+Cl | 537.3428,459.3833,375.2885                                           | PPD+3Glc+Xyl+Ac        |       | RG-8  |  |
| 218 | 1195.6135 <sup>b</sup> | C <sub>56</sub> H <sub>94</sub> O <sub>24</sub>  | 17.88 | 1.5  | 352.11                   | +HCOO,+Cl    | 1149.6085,1107.5939,945.5412,783.489<br>4,621.4363,459.3931,375.2891 | PPD+4Glc+Ac            | WG-11 | RG-11 |  |
| 219 | 1093.5825              | C <sub>52</sub> H <sub>88</sub> O <sub>21</sub>  | 18.00 | 2.3  | 334.89                   | +HCOO,-H     | 621.4364,459.3834                                                    | PPD+2Glc+2Xyl          |       | RG-13 |  |
| 220 | 1163.5878 <sup>b</sup> | C <sub>56</sub> H <sub>92</sub> O <sub>25</sub>  | 18.30 | 2.0  | 339.96                   | -H           | 1077.5861,945.5423,783.4888,621.4359,<br>459.3834,375.2895           | PPD+3Glc+Xyl+Mal       | WG-9  | RG-11 |  |
| 221 | 1165.5985 <sup>b</sup> | C <sub>55</sub> H <sub>92</sub> O <sub>23</sub>  | 18.32 | -2.2 | 365.41/337.27            | +HCOO,-H     | 1119.5970,783.4848,621.4354,459.3828,<br>375.2890                    | PPD+3Glc+Xyl+Ac        | WG-8  | RG-8  |  |
| 222 | 793.4382 <sup>a</sup>  | C <sub>42</sub> H <sub>66</sub> O <sub>14</sub>  | 18.52 | 0.3  | 283.95/219.43<br>/181.78 | -H, +Cl      | 631.3833,455.3516                                                    | Chikusetsusaponin IVa  | WG-6  | RG-13 |  |
| 223 | 1029.5295 <sup>b</sup> | C <sub>51</sub> H <sub>82</sub> O <sub>21</sub>  | 18.57 | 1.8  | 330.69                   | +HCOO        | 943.5243,673.3392,457.3675,373.2735                                  | Dedihydro-PPD+3Glc+Mal | WG-7  | RG-8  |  |
| 224 | 793.4386               | C <sub>42</sub> H <sub>66</sub> O <sub>14</sub>  | 18.63 | 0.8  | 283.60/220.02<br>/182.24 | -H           | 631.3834,455.3516,437.3409                                           | OA+Glc+GlurA           | WG-5  | RG-6  |  |
| 225 | 1163.5878 <sup>b</sup> | C <sub>56</sub> H <sub>92</sub> O <sub>25</sub>  | 18.89 | 2.0  | 341.98                   | -H           | 1077.5853,945.5423,783.4887,621.4363,<br>459.3829,375.2893           | PPD+3Glc+Xyl+Mal       | WG-9  | RG-8  |  |
| 226 | 725.4487 <sup>b</sup>  | C <sub>38</sub> H <sub>64</sub> O <sub>10</sub>  | 19.32 | 0.7  | 280.33                   | +HCOO, -H    | 679.4431,475.3768                                                    | PPT+Glc+Ac             | WG-10 | RG-10 |  |
| 227 | 991.5504               | C <sub>48</sub> H <sub>82</sub> O <sub>18</sub>  | 19.45 | 2.1  | 390.49                   | +HCOO, -H    | 945.5429,783.4900,621.4359,459.3834,3<br>75.2894                     | PPD+3Glc               | WG-11 | RG-6  |  |
| 228 | 1163.5868              | C <sub>56</sub> H <sub>92</sub> O <sub>25</sub>  | 19.49 | 1.1  | 361.72/285.76            | -H           | 1077.5839,945.5407,783.4884,621.4359,<br>459.3832,375.2888           | PPD+3Glc+Xyl+Mal       | WG-10 | RG-11 |  |



|     |                        |                                                  |       |      |                          |              |                                                                              |                  |       |       |
|-----|------------------------|--------------------------------------------------|-------|------|--------------------------|--------------|------------------------------------------------------------------------------|------------------|-------|-------|
| 229 | 1165.5987 <sup>b</sup> | C <sub>55</sub> H <sub>92</sub> O <sub>23</sub>  | 19.48 | -2.1 | 360.77                   | +HCOO, -H    | 1077.5838,927.5308,765.4787,621.4356,<br>537.3419,459.3825,375.2891          | PPD+3Glc+Xyl+Ac  | WG-10 | RG-10 |
| 230 | 991.5500 <sup>a</sup>  | C <sub>48</sub> H <sub>82</sub> O <sub>18</sub>  | 19.45 | 1.7  | 327.83/262.56            | +HCOO, -H    | 945.5415,783.4887,621.4354,459.3833,3<br>75.2893                             | Ginsenoside-Rd   | WG-7  | RG-11 |
| 231 | 1195.6123 <sup>b</sup> | C <sub>56</sub> H <sub>94</sub> O <sub>24</sub>  | 19.54 | 0.5  | 351.60                   | +HCOO,Cl     | 1107.5923,837.4094,459.3825                                                  | PPD+4Glc+Ac      | WG-10 | RG-10 |
| 232 | 1251.6391 <sup>b</sup> | C <sub>60</sub> H <sub>100</sub> O <sub>27</sub> | 19.67 | 0.9  | 358.85/287.11<br>/236.84 | -H,+HCOO,+Cl | 1078.5875,784.4916,621.4358,537.3420,<br>459.3827                            | PPD+3Glc+2Xyl+Ac | WG-11 | RG-11 |
| 233 | 725.4494 <sup>a</sup>  | C <sub>38</sub> H <sub>64</sub> O <sub>10</sub>  | 19.87 | 1.84 | 283.10                   | +HCOO        | 603.4260                                                                     | Compound II      | WG-7  | RG-6  |
| 234 | 1165.6026              | C <sub>55</sub> H <sub>92</sub> O <sub>23</sub>  | 20.03 | 1.3  | 348.02                   | +HCOO, -H    | 1077.5852,621.4353,537.3427,459.3828,<br>375.2892                            | PPD+3Glx+Xyl+Ac  | WG-7  | RG-7  |
| 235 | 1163.5877              | C <sub>56</sub> H <sub>92</sub> O <sub>25</sub>  | 20.10 | 1.9  | 348.68                   | -H           | 1077.5846,459.3830,375.2895                                                  | PPD+3Glc+Xyl+Mal | WG-9  | RG-10 |
| 236 | 1031.5449 <sup>a</sup> | C <sub>51</sub> H <sub>84</sub> O <sub>21</sub>  | 20.43 | 1.6  | 335.11/258.12            | -H           | 945.5412,783.4888,621.4357,459.3830,3<br>75.2892.                            | m-Ginsenoside Rd | WG-8  | RG-8  |
| 237 | 1033.5569              | C <sub>50</sub> H <sub>84</sub> O <sub>19</sub>  | 20.45 | -1.9 | 335.84                   | +HCOO, -H    | 945.5415,675.3576,537.3402,459.3837,3<br>75.2891                             | PPD+3Glc+Ac      | WG-11 | RG-12 |
| 238 | 1251.6382 <sup>b</sup> | C <sub>60</sub> H <sub>100</sub> O <sub>27</sub> | 20.66 | 0.2  | 361.66                   | -H,+HCOO,+Cl | 1209.6264,915.5365,783.4891,621.4355,<br>459.3833                            | PPD+3Glc+Xyl+Ac  |       | RG-11 |
| 239 | 1297.6450              | C <sub>60</sub> H <sub>100</sub> O <sub>27</sub> | 20.82 | 0.5  | 364.03                   | +HCOO, -H    | 1251.6360,945.5409,784.4948,717.3623,<br>621.4356,537.3417,459.3826,375.2891 | PPD+3Glc+2Xyl+Ac | WG-10 | RG-10 |
| 240 | 1031.5453              | C <sub>51</sub> H <sub>84</sub> O <sub>21</sub>  | 20.86 | 2.0  | 259.68                   | -H           | 945.5430,783.4895,621.4368,459.2832,3<br>75.2900                             | PPD+3Glc+Mal     | WG-9  | RG-9  |
| 241 | 1033.5592              | C <sub>50</sub> H <sub>84</sub> O <sub>19</sub>  | 20.86 | 0.3  | 337.96                   | +HCOO, -H    | 945.5432,747.3798,675.3538,537.3433,4<br>43.3517,375.2896                    | PPD+3Glc+Ac      | WG-11 | RG-9  |

|     |                        |                                                  |       |      |               |              |                                                                     |                                                  |       |       |
|-----|------------------------|--------------------------------------------------|-------|------|---------------|--------------|---------------------------------------------------------------------|--------------------------------------------------|-------|-------|
| 242 | 1165.6027 <sup>b</sup> | C <sub>55</sub> H <sub>92</sub> O <sub>23</sub>  | 20.91 | 1.4  | 349.08        | +HCOO, -H    | 969.4453,621.4370,459.3842,375.2898                                 | PPD+3Glc+Xyl+Ac                                  | WG-6  |       |
| 243 | 1327.6567 <sup>b</sup> | C <sub>61</sub> H <sub>102</sub> O <sub>28</sub> | 21.08 | 2.1  | 375.15        | +HCOO,-H,+Cl | 1239.6402,1077.5846,945.5432,783.489<br>3,621.4359,459.3831         | PPD+4Glc+Xyl+Ac                                  | WG-11 | RG-11 |
| 244 | 1165.6031              | C <sub>55</sub> H <sub>92</sub> O <sub>23</sub>  | 21.14 | 1.7  | 358.87        | +HCOO, -H    | 1077.5947,783.4902,621.4356,459.3735,<br>375.2891                   | PPD+3Glx+Xyl+Ac                                  | WG-9  | RG-9  |
| 245 | 1033.5569 <sup>b</sup> | C <sub>50</sub> H <sub>84</sub> O <sub>19</sub>  | 21.14 | -2.0 | 339.58        | +HCOO, -H    | 537.3425,459.3817,375.2895                                          | PPD+3Glc+Ac                                      | WG-2  | RG-2  |
| 246 | 1195.6140              | C <sub>56</sub> H <sub>94</sub> O <sub>24</sub>  | 21.26 | 1.9  | 360.79        | +HCOO,-H,+Cl | 1107.5947,945.5431,783.4887,621.4359,<br>537.3417,459.3835,375.2892 | PPD+4Glc+Ac                                      | WG-10 | RG-10 |
| 247 | 1165.6031 <sup>b</sup> | C <sub>55</sub> H <sub>92</sub> O <sub>23</sub>  | 21.44 | 1.7  | 354.30        | +HCOO, -H    | 1077.5861,945.5433,783.4890,621.4351,<br>537.3420,375.2893          | PPD+3Glx+Xyl+Ac                                  |       | RG-9  |
| 248 | 1117.5450              | C <sub>54</sub> H <sub>86</sub> O <sub>24</sub>  | 21.50 | 1.2  | 334.35/255.43 | -H           | 945.5415,927.5309,783.4892,621.4357,4<br>59.3829,375.2892           | Malonylfloralginsenoside Rd6<br>or isomer        | WG-9  | RG-9  |
| 249 | 1033.5567 <sup>b</sup> | C <sub>50</sub> H <sub>84</sub> O <sub>19</sub>  | 21.60 | -2.1 | 336.25        | +HCOO, -H    | 945.5417,621.4347,537.3435,459.3829,3<br>75.2891                    | PPD+3Glc+Ac                                      | WG-7  | RG-9  |
| 250 | 1031.5445              | C <sub>51</sub> H <sub>84</sub> O <sub>21</sub>  | 21.60 | 1.2  | 333.26        | -H           | 945.5417,621.4347,537.3435,459.3829                                 | PPD+3Glc+Mal                                     | WG-7  | RG-9  |
| 251 | 1221.6292              | C <sub>58</sub> H <sub>96</sub> O <sub>24</sub>  | 21.77 | 1.5  | 360.71        | +HCOO,-H,+Cl | 1107.5957,945.5412,784.621.4348,459.3<br>822                        | PPD+4Glc+Butenoyl<br>(Ginsenoside Ra6 or isomer) | WG-10 | RG-10 |
| 252 | 991.5501 <sup>a</sup>  | C <sub>48</sub> H <sub>82</sub> O <sub>18</sub>  | 21.78 | 1.8  | 321.73        | +HCOO,-H,+Cl | 928.5363,784.4920,622.4385,459.3835,4<br>23.3245                    | Notoginsenoside K                                | WG-9  | RG-10 |
| 253 | 1033.5599 <sup>b</sup> | C <sub>50</sub> H <sub>84</sub> O <sub>19</sub>  | 21.80 | 1.0  | 337.20        | +HCOO,+Cl    | 945.5420,783.4918,621.4366,459.3835,3<br>75.2893                    | PPD+3Glc+Ac                                      | WG-9  | RG-7  |
| 254 | 1031.5449              | C <sub>51</sub> H <sub>84</sub> O <sub>21</sub>  | 21.89 | 1.7  | 334.20        | -H           | 945.5425,783.4893,621.4361,459.3825,3<br>75.2891                    | PPD+3Glc+Mal                                     | WG-8  | RG-6  |

|     |                        |                                                  |       |      |               |              |                                                                               |                                                                                    |       |       |
|-----|------------------------|--------------------------------------------------|-------|------|---------------|--------------|-------------------------------------------------------------------------------|------------------------------------------------------------------------------------|-------|-------|
| 255 | 1251.6397 <sup>b</sup> | C <sub>60</sub> H <sub>100</sub> O <sub>27</sub> | 21.95 | 1.4  | 358.87        | -H,+HCOO,+Cl | 1209.6266,1077.5858,945.5405,783.490<br>4,621.4350,459.3829                   | PPD+3Glc+2Xyl+Ac                                                                   |       | RG-11 |
| 256 | 827.4802               | C <sub>42</sub> H <sub>70</sub> O <sub>13</sub>  | 22.06 | 0.4  | 308.44        | +HCOO,-H     | 781.4745,585.3789,437.3411,375.2888                                           | Sanchirinoside B or isomer                                                         | WG-6  | RG-6  |
| 257 | 853.4607               | C <sub>43</sub> H <sub>68</sub> O <sub>14</sub>  | 22.08 | 1.8  | 316.93        | +HCOO,-H     | 645.3994,537.3573,455.3525,437.3409                                           | PPD+Glc+GlurA+CH <sub>3</sub><br>(chikusetsusaponin IVa methyl<br>ester or isomer) | WG-6  | RG-7  |
| 258 | 1165.6046 <sup>b</sup> | C <sub>55</sub> H <sub>92</sub> O <sub>23</sub>  | 22.13 | 3.0  | 355.82        | +HCOO,-H,+Cl | 1077.5854,945.5434,783.4920,621.4371,<br>459.3834,375.2895                    | PPD+3Glc+Xyl+Ac                                                                    | WG-8  | RG-8  |
| 259 | 1031.5437              | C <sub>51</sub> H <sub>84</sub> O <sub>21</sub>  | 22.23 | 0.4  | 335.50/261.91 | -H           | 621.4358,537.3415,459.3823                                                    | PPD+3Glc+Mal                                                                       | WG-7  | RG-7  |
| 260 | 1033.5568 <sup>b</sup> | C <sub>50</sub> H <sub>84</sub> O <sub>19</sub>  | 22.23 | -2.0 | 337.56        | +HCOO,-H     | 945.5431,783.4868,621.4358,537.3415,4<br>59.3823,375.2890                     | PPD+3Glc+Ac                                                                        | WG-7  | RG-7  |
| 261 | 961.5394               | C <sub>47</sub> H <sub>80</sub> O <sub>17</sub>  | 22.24 | 1.6  | 321.64        | +HCOO        | 621.4352,459.3820,375.2885                                                    | PPD+2Glc+Xyl                                                                       | WG-4  | RG-7  |
| 262 | 1117.5457 <sup>b</sup> | C <sub>54</sub> H <sub>86</sub> O <sub>24</sub>  | 22.29 | 1.8  | 332.29/266.28 | -H           | 998.45493,459.38348,375.2893                                                  | Malonyfloralginsenoside Rd6<br>or isomer                                           | WG-9  | RG-9  |
| 263 | 1277.6556              | C <sub>62</sub> H <sub>102</sub> O <sub>27</sub> | 22.34 | 1.6  | 366.49/239.02 | +HCOO,-H,+Cl | 1077.5873,783.4866,459.3827,375.2887                                          | PPD+3Glc+2Xyl+butenoyl<br>(Ginsenoside Ra4 or isomer)                              | WG-11 | RG-11 |
| 264 | 1033.5610 <sup>b</sup> | C <sub>50</sub> H <sub>84</sub> O <sub>19</sub>  | 22.51 | 2.1  | 333.82        | +HCOO,-H,+Cl | 987.5555,945.5430,537.3436,459.3834,3<br>75.2898                              | PPD+3Glc+Ac                                                                        |       | RG-6  |
| 265 | 1117.5466 <sup>b</sup> | C <sub>54</sub> H <sub>86</sub> O <sub>24</sub>  | 22.56 | 2.7  | 346.27        | -H           | 945.5408,537.3423,459.3832,375.2893                                           | PPD+3Glc+2Mal<br>(Malonyfloralginsenoside Rd6<br>or isomer)                        | WG-9  | RG-8  |
| 266 | 1191.6187              | C <sub>57</sub> H <sub>94</sub> O <sub>23</sub>  | 22.66 | 1.6  | 357.08        | +HCOO,-H,+Cl | 1145.6078,1078.5895,946.4345,783.484<br>3,621.4364,537.3423,459.3831,375.2897 | PPD+3Glc+Xyl+Butenoyl                                                              | WG-7  | RG-9  |
| 267 | 1165.6036 <sup>b</sup> | C <sub>55</sub> H <sub>92</sub> O <sub>23</sub>  | 22.82 | 2.1  | 366.96        | +HCOO,-H,+Cl | 1119.5927,1077.5851,945.5412,783.490                                          | PPD+3Glc+Xyl+Ac                                                                    |       | RG-9  |

|     |                        |                                                 |       |      |        |              |                                                                           |                                                  |       |          |  |
|-----|------------------------|-------------------------------------------------|-------|------|--------|--------------|---------------------------------------------------------------------------|--------------------------------------------------|-------|----------|--|
|     |                        |                                                 |       |      |        |              |                                                                           | 0,621.4359,459.3834,375.2892                     |       |          |  |
| 268 | 961.5388               | C <sub>47</sub> H <sub>80</sub> O <sub>17</sub> | 22.85 | 1.1  | 319.23 | +HCOO,-H     | 915.5311,783.4891,621.4361,537.3421,459.3830,375.2890                     | PPD+2Glc+Xyl                                     | WG-7  | RG-7     |  |
| 269 | 797.4700 <sup>a</sup>  | C <sub>41</sub> H <sub>68</sub> O <sub>12</sub> | 22.93 | 0.96 | 293.79 | -H,+HCOO     | 751.4621,619.4206,457.3549                                                | Ginsenoside Rg6                                  |       | RG-total |  |
| 270 | 1033.5604 <sup>b</sup> | C <sub>50</sub> H <sub>84</sub> O <sub>19</sub> | 23.05 | 1.5  | 337.70 | +HCOO,-H     | 945.5444,537.3438,459.3845,375.2895                                       | PPD+3Glc+Ac                                      | WG-11 | RG-6     |  |
| 271 | 1221.6292 <sup>b</sup> | C <sub>58</sub> H <sub>96</sub> O <sub>24</sub> | 23.17 | 1.8  | 359.58 | +HCOO,-H,+Cl | 1175.6238,1107.5964,717.3627,459.3829,375.2889                            | PPD+4Glc+Butenoyl<br>(Ginsenoside Ra6 or isomer) | WG-9  | RG-10    |  |
| 272 | 1191.6193              | C <sub>57</sub> H <sub>94</sub> O <sub>23</sub> | 23.23 | 2.1  | 365.75 | +HCOO,-H,+Cl | 1145.6111,1059.5760,946.4392,783.4887                                     | PPD+3Glc+Xyl+Butenoyl                            | WG-9  | RG-9     |  |
| 273 | 1001.5343 <sup>b</sup> | C <sub>50</sub> H <sub>82</sub> O <sub>20</sub> | 23.30 | 1.6  | 328.39 | -H           | 915.5324,783.4890,621.4368,537.3427,459.3832,375.2893                     | PPD+2Glc+Xyl+Mal                                 | WG-7  | RG-10    |  |
| 274 | 1033.5600 <sup>b</sup> | C <sub>50</sub> H <sub>84</sub> O <sub>19</sub> | 23.34 | 1.1  | 340.07 | +HCOO,-H,+Cl | 945.5420,537.3403,375.2893                                                | PPD+3Glc+Ac                                      |       | RG-6     |  |
| 275 | 1001.5341 <sup>b</sup> | C <sub>50</sub> H <sub>82</sub> O <sub>20</sub> | 23.43 | 1.4  | 328.34 | -H           | 915.5311,783.4894,621.4360,537.3408,459.3840,375.2892                     | PPD+2Glc+Xyl+Mal                                 | WG-7  | RG-7     |  |
| 276 | 961.5394               | C <sub>47</sub> H <sub>80</sub> O <sub>17</sub> | 23.48 | 1.7  | 317.89 | +HCOO,-H,+Cl | 621.4360,537.3408,459.3841,375.2892                                       | PPD+2Glc+Xyl                                     | WG-7  | RG-7     |  |
| 277 | 811.4857               | C <sub>42</sub> H <sub>70</sub> O <sub>12</sub> | 23.48 | 0.5  | 269.37 | +HCOO,-H,+Cl | 765.4770,619.4208                                                         | 5,6-Dedihydro-PPD+Glc+Rha                        |       | RG-11    |  |
| 278 | 1075.5703 <sup>b</sup> | C <sub>53</sub> H <sub>88</sub> O <sub>22</sub> | 23.63 | 0.8  | 446.40 | -H           | 1040.4664,837.4055,621.4368,537.3432,459.3830,375.2896                    | Chikusetsusaponin FK3 or isomer                  | WG-7  | RG-7     |  |
| 279 | 1033.5602 <sup>b</sup> | C <sub>50</sub> H <sub>84</sub> O <sub>19</sub> | 23.67 | 1.3  | 333.06 | +HCOO,-H,+Cl | 945.5394,537.3427,459.3834,441.3704,375.2885                              | PPD+3Glc+Ac                                      |       | RG-6     |  |
| 280 | 1119.6188 <sup>b</sup> | C <sub>57</sub> H <sub>94</sub> O <sub>23</sub> | 23.51 | 2.0  | 359.52 | +HCOO,-H,+Cl | 1145.6135,1077.5882,969.4466,716.3601,675.3562,537.3415,459.3833,375.2896 | PPD+3Glc+Xyl+Butenoyl                            | WG-9  | RG-9     |  |

|     |                        |                                                 |       |     |        |              |                                                           |                                                  |      |       |
|-----|------------------------|-------------------------------------------------|-------|-----|--------|--------------|-----------------------------------------------------------|--------------------------------------------------|------|-------|
| 281 | 1029.5289 <sup>b</sup> | C <sub>50</sub> H <sub>80</sub> O <sub>19</sub> | 23.92 | 1.3 | 326.84 | +HCOO,-H     | 983.5222,659.4146,537.3556,455.3517,437.3416              | PPD+2Glc+GlurA+Ethyl ester                       |      | RG-11 |
| 282 | 1191.6189 <sup>b</sup> | C <sub>57</sub> H <sub>94</sub> O <sub>23</sub> | 24.00 | 1.8 | 353.48 | +HCOO,-H,+Cl | 1077.5835,783.4873,621.4352,459.3829,375.2890             | PPD+3Glc+Xyl+Butenoyl                            | WG-6 | RG-7  |
| 283 | 811.4858               | C <sub>42</sub> H <sub>70</sub> O <sub>12</sub> | 24.01 | 1.1 | 302.98 | +HCOO,-H     | 675.3540,621.4369,443.3524                                | Ginsenoside Rg8 or isomer                        | WG-6 | RG-8  |
| 284 | 1033.5602 <sup>b</sup> | C <sub>50</sub> H <sub>84</sub> O <sub>19</sub> | 24.06 | 1.2 | 338.29 | +HCOO,-H,+Cl | 987.5552,783.783.4908,605.4012,537.3423,459.3843,375.2889 | PPD+3Glc+Ac                                      | WG-6 | RG-6  |
| 285 | 1001.5343 <sup>b</sup> | C <sub>50</sub> H <sub>82</sub> O <sub>20</sub> | 24.21 | 1.6 | 327.02 | -H           | 915.5292,621.4350,537.3431,459.3830,375.2894              | PPD+2Glc+Xyl+Mal                                 | WG-7 |       |
| 286 | 665.4275 <sup>a</sup>  | C <sub>36</sub> H <sub>60</sub> O <sub>8</sub>  | 24.27 | 0.7 | 274.85 | +HCOO,+Cl    | 457.3650,354.2012                                         | Ginsenoside Rk3                                  | WG-2 | RG-2  |
| 287 | 1033.5599 <sup>b</sup> | C <sub>50</sub> H <sub>84</sub> O <sub>19</sub> | 24.38 | 1.0 | 338.49 | +HCOO,-H,+Cl | 945.5421,675.3557,621.4371,459.3820,375.2889              | PPD+3Glc+Ac                                      | WG-6 | RG-6  |
| 288 | 1191.6182 <sup>b</sup> | C <sub>57</sub> H <sub>94</sub> O <sub>23</sub> | 24.54 | 1.2 | 357.08 | +HCOO,-H,+Cl | 1077.5826,783.4880,621.4363,537.3428,459.3822,375.2895    | PPD+3Glc+Xyl+Butenoyl                            | WG-8 | RG-9  |
| 289 | 975.5552               | C <sub>48</sub> H <sub>82</sub> O <sub>17</sub> | 24.68 | 1.8 | 324.25 | +HCOO,-H,+Cl | 929.5488,783.4895,459.3824,375.2896                       | PPD+2Glc+Rha                                     | WG-7 | RG-7  |
| 290 | 975.5551 <sup>b</sup>  | C <sub>48</sub> H <sub>82</sub> O <sub>17</sub> | 24.83 | 1.7 | 323.50 | +HCOO,-H,+Cl | 929.5465,537.3435,375.2893.                               | PPD+2Glc+Rha                                     | WG-7 | RG-7  |
| 291 | 1059.5755              | C <sub>52</sub> H <sub>86</sub> O <sub>19</sub> | 24.92 | 0.9 | 344.65 | +HCOO,-H,+Cl | 1013.5698,946.5449,537.3431,459.3831,375.2882             | PPD+3Glc+Butenoyl<br>(Quinquenoside I or isomer) | WG-6 | RG-6  |
| 292 | 1015.5502 <sup>b</sup> | C <sub>51</sub> H <sub>84</sub> O <sub>20</sub> | 25.13 | 1.9 | 328.22 | -H           | 929.5462,605.4050,537.3437,459.3828,375.2893              | PPD+2Glc+Rha+Mal                                 | WG-7 | RG-7  |
| 293 | 707.4379               | C <sub>38</sub> H <sub>62</sub> O <sub>9</sub>  | 25.07 | 0.5 | 280.61 | +HCOO,-H     | 661.4331,637.4309,457.3671                                | Ginsenoside Rs7 or isomer                        |      | RG-3  |

|     |                        |                                                  |       |      |         |              |                                                   |                                                                                                      |       |       |
|-----|------------------------|--------------------------------------------------|-------|------|---------|--------------|---------------------------------------------------|------------------------------------------------------------------------------------------------------|-------|-------|
| 294 | 1191.6180 <sup>b</sup> | C <sub>57</sub> H <sub>94</sub> O <sub>23</sub>  | 25.29 | 1.0  | 370.98  | +HCOO, -H    | 1077.5817,459.3839,375.2882                       | PPD+3Glc+Xyl+Butenoyl<br>OA-3-Glc-GlurA                                                              | WG-8  | RG-9  |
| 295 | 793.4386               | C <sub>42</sub> H <sub>66</sub> O <sub>14</sub>  | 25.34 | 0.6  | 302.79, | -H, +Cl      | 613.3728,569.3832,455.3515                        | (Chikusetsusaponin IVa or<br>isomer)                                                                 | WG-6  | RG-6  |
| 296 | 829.4967 <sup>a</sup>  | C <sub>42</sub> H <sub>72</sub> O <sub>13</sub>  | 25.37 | 1.2  | 301,54  | +HCOO        | 620.3841,497.3626,453.3363,437.3411               | Ginsenoside F2                                                                                       | WG-10 | RG-7  |
| 297 | 925.4816               | C <sub>47</sub> H <sub>74</sub> O <sub>18</sub>  | 25.72 | 1.5  | 335.76  | -H           | 587.3963,569.3836,551.3736,455.3517               | OA+GlurA+Xyl+Glc                                                                                     | WG-6  | RG-6  |
| 298 | 1059.5761 <sup>b</sup> | C <sub>52</sub> H <sub>86</sub> O <sub>19</sub>  | 26.11 | 1.5  | 344.83  | +HCOO,-H,+Cl | 945.5398,621.4337,537.3439,459.3832,3<br>75.2893  | PPD+3Glc+Butenoyl<br>(Quinquenoside I or isomer)                                                     | WG-7  | RG-7  |
| 299 | 1075.5707 <sup>b</sup> | C <sub>52</sub> H <sub>86</sub> O <sub>20</sub>  | 26.32 | 1.1  | 347.31  | +HCOO, -H    | 946.5443,621.4361,537.3425,459.3825,3<br>75.2886  | PPD+3Glc+2Ac                                                                                         |       | RG-6  |
| 300 | 1277.6925              | C <sub>62</sub> H <sub>104</sub> O <sub>24</sub> | 26.57 | 2.0  | 370.39  | +HCOO,-H,+Cl | 945.5408,621.4349,459.3833,375.2888               | PPD+4Glc+CH <sub>3</sub> (CH <sub>2</sub> ) <sub>4</sub> CH=C<br>HCO (Quinquenoside II or<br>isomer) | WG-9  | RG-6  |
| 301 | 961.5390               | C <sub>47</sub> H <sub>80</sub> O <sub>17</sub>  | 26.64 | 1.3  | 312.50  | +HCOO, -H    | 915.5312,783.4890,621.4364,573.3193,4<br>59.3824  | PPD+2Glc+Xyl                                                                                         | WG-11 |       |
| 302 | 829.4960 <sup>a</sup>  | C <sub>42</sub> H <sub>72</sub> O <sub>13</sub>  | 26.69 | 0.7  | 300.13  | +HCOO,-H,+Cl | 783.4894,621.4378,459.3826,375.2898               | 20S-Ginsenoside Rg3                                                                                  | WG-11 | RG-6  |
| 303 | 667.4424               | C <sub>36</sub> H <sub>62</sub> O <sub>8</sub>   | 26.69 | -0.3 | 285.55  | +HCOO        | 459.3826,375.2891                                 | PPD+Glc                                                                                              |       | RG-11 |
| 304 | 871.5069               | C <sub>44</sub> H <sub>74</sub> O <sub>14</sub>  | 26.97 | 0.9  | 310.64  | +HCOO,-H     | 783.4882,538.0604,375.2896                        | PPD+2Glc+Ac                                                                                          | WG-5  | RG-6  |
| 305 | 895.5060               | C <sub>46</sub> H <sub>74</sub> O <sub>14</sub>  | 27.01 | 0.0  | 333.82  | +HCOO,-H     | 687.4466,537.3513,455.3518,437.3413               | OA+Glc+GlurA+Butyl                                                                                   |       | RG-13 |
| 306 | 1057.5599              | C <sub>52</sub> H <sub>84</sub> O <sub>19</sub>  | 27.01 | 1.0  | 335.82  | +HCOO,-H     | 1011.5639,687.4466,537.3513,455.3518,<br>437.3413 | OA+2Glc+GlurA+Butyl                                                                                  |       | RG-13 |
| 307 | 829.4960 <sup>a</sup>  | C <sub>42</sub> H <sub>72</sub> O <sub>13</sub>  | 27.05 | 0.6  | 296.3   | +HCOO,-H     | 783.4870,621.4340,459.3823,375.2891               | (20R)-Ginsenoside Rg3                                                                                | WG-7  | RG-7  |

|     |                        |                                                  |       |     |        |              |                                                         |                                              |       |       |
|-----|------------------------|--------------------------------------------------|-------|-----|--------|--------------|---------------------------------------------------------|----------------------------------------------|-------|-------|
| 308 | 871.5066               | C <sub>44</sub> H <sub>74</sub> O <sub>14</sub>  | 27.33 | 0.6 | 309.38 | +HCOO,-H     | 825.4978,783.4886,621.4358,621.4358,459.3828,375.2888   | PPD+2Glc+Ac                                  | WG-7  | RG-6  |
| 309 | 763.4279               | C <sub>41</sub> H <sub>64</sub> O <sub>13</sub>  | 27.63 | 0.7 | 305.89 | -H           | 455.3511,397.2249                                       | OA+GlurA+Xyl                                 |       | RG-5  |
| 310 | 1195.6146 <sup>b</sup> | C <sub>56</sub> H <sub>94</sub> O <sub>24</sub>  | 27.81 | 2.4 | 355.37 | +HCOO,-H     | 1149.6028,1108.6002,945.5423,783.4889,459.3834,375.2892 | PPD+4Glc+Ac                                  |       | RG-9  |
| 311 | 871.5063 <sup>b</sup>  | C <sub>44</sub> H <sub>74</sub> O <sub>14</sub>  | 28.22 | 0.3 | 310.89 | +HCOO,-H     | 783.4876,621.4336,459.3831,375.2888                     | PPD+2Glc+Ac                                  | WG-6  | RG-6  |
| 312 | 871.5065               | C <sub>44</sub> H <sub>74</sub> O <sub>14</sub>  | 29.22 | 0.5 | 312.62 | +HCOO,-H,+Cl | 783.3831,459.3812,375.2885                              | PPD+2Glc+Ac                                  | WG-11 | RG-11 |
| 313 | 871.5068               | C <sub>44</sub> H <sub>74</sub> O <sub>14</sub>  | 29.61 | 0.8 | 309.55 | +HCOO,-H,+Cl | 783.3831,459.3812,375.2885                              | PPD+2Glc+Ac                                  |       | RG-13 |
| 314 | 1261.6757              | C <sub>65</sub> H <sub>100</sub> O <sub>21</sub> | 30.19 | 2.5 | 371.68 | +HCOO,-H     | 1215.6715,793.4381,613.3737,569.3843,455.3508           | Polyacetyleneginsenoside-Ro or isomer        |       | RG-9  |
| 315 | 1261.6778 <sup>b</sup> | C <sub>65</sub> H <sub>100</sub> O <sub>21</sub> | 30.63 | 3.1 | 366.64 | +HCOO,-H     | 731.4377,569.3838,455.3521                              | Polyacetyleneginsenoside-Ro or isomer        | WG-4  | RG-6  |
| 316 | 811.4874 <sup>a</sup>  | C <sub>42</sub> H <sub>70</sub> O <sub>12</sub>  | 30.65 | 3.1 | 311.87 | +HCOO,-H     | 765.4780,622.4415,537.3106,438.9777                     | Ginsenoside Rk1                              | WG-8  | RG-6  |
| 317 | 853.4970               | C <sub>44</sub> H <sub>72</sub> O <sub>13</sub>  | 30.88 | 1.8 | 319.40 | +HCOO,-H     | 807.4886,765.4790,603.4254,621.4368,441.3505            | Ginsenoside Rs4 or Ginsenoside Rs5 or isomer | WG-6  | RG-6  |
| 318 | 1215.6712 <sup>b</sup> | C <sub>65</sub> H <sub>100</sub> O <sub>21</sub> | 30.96 | 2.3 | 384.26 | -H           | 794.4451,587.5943,455.3517                              | Polyacetyleneginsenoside-Ro or isomer        |       | RG-10 |
| 319 | 811.4862 <sup>a</sup>  | C <sub>42</sub> H <sub>70</sub> O <sub>12</sub>  | 31.11 | 1.6 | 318.11 | +HCOO,-H,+Cl | 765.4809,475.5903,460.2649,455.3525                     | Ginsenoside Rg5                              | WG-6  | RG-6  |
| 320 | 853.4965 <sup>b</sup>  | C <sub>44</sub> H <sub>72</sub> O <sub>13</sub>  | 31.34 | 1.2 | 325.97 | +HCOO,-H     | 807.4911,765.4786,603.4256,439.3560                     | Ginsenoside Rs4 or Ginsenoside Rs5 or isomer | WG-6  | RG-6  |
| 321 | 853.4968               | C <sub>44</sub> H <sub>72</sub> O <sub>13</sub>  | 31.76 | 1.5 | 323.10 | +HCOO,-H     | 765.4766,603.4330                                       | Ginsenoside Rs4/Rs5 or isomer                |       | RG-6  |
| 322 | 1099.6226              | C <sub>59</sub> H <sub>90</sub> O <sub>16</sub>  | 32.45 | 1.4 | 349.41 | +HCOO,-H,+Cl | 1053.6166,771.5049,613.3730,455.3512,                   | Baisanqisaponin C                            | WG-2  | RG-2  |

437.3405

orbaisanqisaponin A isomer

|     |          |                                                 |       |     |        |              |                                     |                               |      |       |
|-----|----------|-------------------------------------------------|-------|-----|--------|--------------|-------------------------------------|-------------------------------|------|-------|
| 323 | 853.4965 | C <sub>44</sub> H <sub>72</sub> O <sub>13</sub> | 32.82 | 1.1 | 319.96 | +HCOO,-H,+Cl | 807.4911,765.3853,603.4236,439.3561 | Ginsenoside Rs4/Rs5 or isomer | WG-2 | RG- 2 |
|-----|----------|-------------------------------------------------|-------|-----|--------|--------------|-------------------------------------|-------------------------------|------|-------|

Compound I: (20S,24S,25R)-6-O-[β-D-glucopyranosyl-(1→2)-β-D-glucopyranosyl]-dammar-20,24-epoxy-3β,6α,12β,25,26-pentaol

Compound II: 6-O-β-D-(6'-acetyl)-glucopyranosyl-24-en-dammar-3,6,12,20S-tetraol

<sup>a</sup>: the saponins identified by comparing with the reference compounds.

<sup>b</sup>: the components identified manually based on the MS information because no matching in the in-house library (not reported).

Mal: the saponins identified with a single malonyl substituent.

Dimalonyl: the components identified with two malonyl substituents.

Ac: the components identified with an acetyl substituent.

Butenoyl: the components identified with a butenoyl substituent.
